# Supplementary material for: Prognostic prediction models for adverse birth outcomes: A systematic review
Source: PubMed Central journal article supplement (PMC11503507; doi:10.7189/jogh.14.04214), 2024-10-25
Supplement: jogh-14-04214-s001.pdf [file jogh-14-04214-s001.pdf]

|    |                                                                                                                                                                                                                                                                                                                                                                                                                                                                                                                                                                                                                                                                                                                                                                                                                                                                                                             |                                                          |
|----|-------------------------------------------------------------------------------------------------------------------------------------------------------------------------------------------------------------------------------------------------------------------------------------------------------------------------------------------------------------------------------------------------------------------------------------------------------------------------------------------------------------------------------------------------------------------------------------------------------------------------------------------------------------------------------------------------------------------------------------------------------------------------------------------------------------------------------------------------------------------------------------------------------------|----------------------------------------------------------|
| #5 | #1 AND #2 AND #3 AND #4<br>Filter by study type, language, Text availability (Abstract, Free full text, Full text)                                                                                                                                                                                                                                                                                                                                                                                                                                                                                                                                                                                                                                                                                                                                                                                          | <a href="#">2,842</a><br>February 25, 2022<br>08:19:47PM |
|    | Embase                                                                                                                                                                                                                                                                                                                                                                                                                                                                                                                                                                                                                                                                                                                                                                                                                                                                                                      |                                                          |
| #1 | pregnancy:ti,ab,kw OR 'pregnancy'/exp OR 'pregnant woman':ti,ab,kw OR 'pregnant woman'/exp OR newborn:ti,ab,kw OR 'newborn'/exp OR neonatal:ti,ab,kw OR neonatal OR gestation*:ti,ab,kw OR gestation* OR women:ti,ab,kw OR 'women'/exp OR mother:ti,ab,kw OR 'mother'/exp OR female:ti,ab,kw OR 'female'/exp OR 'pregnant mothers':ti,ab,kw OR 'pregnant mothers' OR 'antenatal mothers':ti,ab,kw OR 'antenatal mothers' OR 'antepartum women':ti,ab,kw OR 'antepartum women' OR neonate:ti,ab,kw OR 'neonate'/exp OR baby:ti,ab,kw OR 'baby'/exp OR child*:ti,ab,kw OR child* OR infant:ti,ab,kw OR 'infant'/exp OR infancy:ti,ab,kw OR 'infancy'/exp                                                                                                                                                                                                                                                      |                                                          |
| #2 | risk:ti,ab,kw OR 'risk'/exp OR risks:ti,ab,kw OR risks OR probability:ti,ab,kw OR 'probability'/exp OR probabilities:ti,ab,kw OR probabilities OR causality:ti,ab,kw OR 'causality'/exp OR causation:ti,ab,kw OR causation OR 'enabling factor':ti,ab,kw OR 'enabling factor' OR 'enabling factors':ti,ab,kw OR 'enabling factors' OR 'predisposing factor':ti,ab,kw OR 'predisposing factor'/exp OR 'predisposing factors':ti,ab,kw OR 'predisposing factors' OR 'prognostic factors':ti,ab,kw OR 'prognostic factors' OR 'prognostic factor':ti,ab,kw OR 'prognostic factor'/exp OR 'prognostic determinants':ti,ab,kw OR 'prognostic determinants' OR determinants:ti,ab,kw OR 'determinants'/exp OR factors:ti,ab,kw OR factors OR factor:ti,ab,kw OR factor OR predictors:ti,ab,kw OR 'predictors'/exp OR 'predictor variable':ti,ab,kw OR 'predictor variable'/exp OR predictor:ti,ab,kw OR predictor |                                                          |
| #3 | 'prediction models':ti,ab,kw OR 'prediction models' OR 'prediction model':ti,ab,kw OR 'prediction model'/exp OR prediction:ti,ab,kw OR 'prediction'/exp OR predictive:ti,ab,kw OR predictive OR forecasting:ti,ab,kw OR 'forecasting'/exp OR 'prognostic model':ti,ab,kw OR 'prognostic model'/exp OR 'predictive model':ab,ti OR 'predictive model'/exp OR prognostic:ti,ab,kw OR prognostic OR predict*:ti,ab,kw OR predict*                                                                                                                                                                                                                                                                                                                                                                                                                                                                              |                                                          |
| #4 | stillbirth:ti,ab,kw OR 'stillbirth'/exp OR 'intrauterine fetal death':ti,ab,kw OR 'intrauterine fetal death'/exp OR 'fetus death':ti,ab,kw OR 'fetus death'/exp OR preterm:ti,ab,kw OR preterm OR prematurity:ti,ab,kw OR 'prematurity'/exp OR 'premature labor':ti,ab,kw OR 'premature labor'/exp OR 'preterm birth':ti,ab,kw OR 'preterm birth'/exp OR 'premature birth':ti,ab,kw OR 'premature birth'/exp OR 'low birth weight':ti,ab,kw OR 'low birth weight'/exp OR lbw:ti,ab,kw OR lbw OR 'small-for-gestational age':ti,ab,kw OR 'small-for-gestational age'/exp OR 'small for gestational age':ti,ab,kw OR 'small for gestational age'/exp OR 'small for date infant':ti,ab,kw OR 'small for date infant'/exp OR sga:ti,ab,kw OR sga OR 'fetal growth restriction':ti,ab,kw OR 'fetal growth restriction'/exp                                                                                       |                                                          |
|    | #1 AND #2 AND #3 AND #4                                                                                                                                                                                                                                                                                                                                                                                                                                                                                                                                                                                                                                                                                                                                                                                                                                                                                     | <a href="#">21,288</a><br>February 24, 2022<br>3:08 PM   |
|    | Web of science                                                                                                                                                                                                                                                                                                                                                                                                                                                                                                                                                                                                                                                                                                                                                                                                                                                                                              |                                                          |

|           |                                                                                                                                                                                                                                                                                                                                                                                                                                                                                                                                                                                   |                                                        |
|-----------|-----------------------------------------------------------------------------------------------------------------------------------------------------------------------------------------------------------------------------------------------------------------------------------------------------------------------------------------------------------------------------------------------------------------------------------------------------------------------------------------------------------------------------------------------------------------------------------|--------------------------------------------------------|
| #1        | <b>Pregnant women</b> (Topic) or <b>Pregnant woman</b> (Topic) or <b>Pregnancy</b> (Topic) or <b>newborn</b> (Topic) or <b>neonatal</b> (Topic) or <b>gestation</b> (Topic) or <b>women</b> (Topic) or <b>mother</b> (Topic) or <b>female</b> (Topic) or <b>Pregnant mothers</b> (Topic) or <b>antenatal mothers</b> (Topic) or <b>antepartum women</b> (Topic) or <b>neonate</b> (Topic) or <b>baby</b> (Topic) or <b>child</b> (Topic) or <b>children</b> (Topic) or <b>infant</b> (Topic) or <b>infancy</b> (Topic)                                                            |                                                        |
| #2        | <b>risk</b> (Topic) or <b>risks</b> (Topic) or <b>probability</b> (Topic) or <b>probabilities</b> (Topic) or <b>causality</b> (Topic) or <b>causation</b> (Topic) or <b>enabling factor</b> (Topic) or <b>enabling factors</b> (Topic) or <b>predisposing factor</b> (Topic) or <b>predisposing factors</b> (Topic) or <b>prognostic factors</b> (Topic) or <b>prognostic factor</b> (Topic) or <b>prognostic determinants</b> (Topic) or <b>determinants</b> (Topic) or <b>factors</b> (Topic) or <b>factor</b> (Topic) or <b>predictor</b> (Topic) or <b>predictors</b> (Topic) |                                                        |
| #3        | <b>prediction models</b> (Topic) or <b>prediction model</b> (Topic) or <b>prediction</b> (Topic) or <b>predictive</b> (Topic) or <b>forecasting</b> (Topic) or <b>prognostic model*</b> (Topic) or <b>predictive model*</b> (Topic) or <b>prediction model*</b> (Topic) or <b>progn*</b> (Topic) or <b>predict*</b> (Topic)                                                                                                                                                                                                                                                       |                                                        |
| #4        | <b>Premature Birth</b> (Topic) or <b>preterm labor</b> (Topic) or <b>Preterm delivery</b> (Topic) or <b>Prematurity</b> (Topic) or <b>premature labor</b> (Topic) or <b>low birth weight</b> (Topic) or <b>"low birthweight"</b> (Topic) or <b>"low birth weight"</b> (Topic) or <b>LBW</b> (Topic) or <b>"small-for-gestational age"</b> (Topic) or <b>"small for gestational age"</b> (Topic) or <b>SGA</b> (Topic) or <b>small for gestational age</b> (Topic) or <b>"fetal growth restriction"</b> (Topic) or <b>fetal growth restriction</b> (Topic)                         |                                                        |
|           | <b>#1 AND #2 AND #3 AND #4</b><br><br><b>Filter eg. Language</b>                                                                                                                                                                                                                                                                                                                                                                                                                                                                                                                  | <a href="#">21,705</a><br>February 24, 2022<br>3:03 PM |
|           | <b>CINAHL</b>                                                                                                                                                                                                                                                                                                                                                                                                                                                                                                                                                                     |                                                        |
| S1        | TI pregnant women OR AB pregnant women OR TI pregnancy OR AB Pregnancy OR TI newborn OR AB newborn OR TI neonatal OR AB neonatal OR TI gestation OR AB gestation OR TI women OR AB women                                                                                                                                                                                                                                                                                                                                                                                          |                                                        |
| S2        | TI mother OR AB mother OR TI female OR AB female OR TI Pregnant mothers OR AB Pregnant mothers OR TI antenatal mothers OR AB antenatal mothers OR TI antepartum women OR AB antepartum women OR TI neonate OR AB neonate                                                                                                                                                                                                                                                                                                                                                          |                                                        |
| S3        | TI baby OR AB baby OR TI child OR AB child OR AB children OR AB children OR TI infant OR AB infant OR TI infancy OR AB infancy                                                                                                                                                                                                                                                                                                                                                                                                                                                    |                                                        |
| S1+S2+S3= | S1 OR S2 OR S3                                                                                                                                                                                                                                                                                                                                                                                                                                                                                                                                                                    |                                                        |
| S4<br>#1  | TI pregnant women OR AB pregnant women OR TI pregnancy OR AB Pregnancy OR TI newborn OR AB newborn OR TI neonatal OR AB neonatal OR TI gestation OR AB gestation OR TI women OR AB women OR TI mother OR AB mother OR TI female OR AB female OR TI Pregnant mothers OR AB Pregnant mothers OR TI antenatal mothers OR AB antenatal mothers OR TI antepartum women OR AB antepartum women OR TI neonate OR AB neonate OR TI baby OR AB baby OR TI child OR AB child OR AB children OR AB children OR TI infant OR AB infant OR TI infancy OR AB infancy                            |                                                        |

|           |                                                                                                                                                                                                                                                                                                                                                                                                                                                                                                                                                                                                                                                                                                                                                                           |  |
|-----------|---------------------------------------------------------------------------------------------------------------------------------------------------------------------------------------------------------------------------------------------------------------------------------------------------------------------------------------------------------------------------------------------------------------------------------------------------------------------------------------------------------------------------------------------------------------------------------------------------------------------------------------------------------------------------------------------------------------------------------------------------------------------------|--|
| S5        | TI risk OR AB risk OR TI risks OR AB risks OR TI probability OR AB probability OR TI probabilities OR AB probabilities OR TI causality OR AB causality OR TI causation OR AB causation                                                                                                                                                                                                                                                                                                                                                                                                                                                                                                                                                                                    |  |
| S6        | TI enabling factors OR AB enabling factors OR TI predisposing factors OR AB predisposing factor OR TI prognostic factors OR AB prognostic factors OR TI prognostic determinants OR AB prognostic determinants OR TI determinants OR AB determinants OR TI risk factors OR AB factors                                                                                                                                                                                                                                                                                                                                                                                                                                                                                      |  |
| S7        | TI predictors OR AB predictors                                                                                                                                                                                                                                                                                                                                                                                                                                                                                                                                                                                                                                                                                                                                            |  |
| S8<br>#2  | S5 OR S6 OR S7<br>TI risk OR AB risk OR TI risks OR AB risks OR TI probability OR AB probability OR TI probabilities OR AB probabilities OR TI causality OR AB causality OR TI causation OR AB causation OR TI enabling factors OR AB enabling factors OR TI predisposing factors OR AB predisposing factors OR TI prognostic factors OR AB prognostic factors OR TI prognostic determinants OR AB prognostic determinants OR TI determinants OR AB determinants OR TI risk factors OR AB factors OR TI predictors OR AB predictors                                                                                                                                                                                                                                       |  |
| S9        | TI prediction model OR AB prediction model OR TI (prediction or predictive or predictors) OR TI (prediction or predictive or predictors ) OR TI forecasting OR AB forecasting OR TI predictive model OR AB predictive model OR TI predictive modeling OR AB predictive modeling OR TI prediction model OR AB prediction model                                                                                                                                                                                                                                                                                                                                                                                                                                             |  |
| S10       | TI prognostic factors OR AB prognostic OR TI prognostication OR AB prognostication OR TI (prognosis or predictor) OR AB ( prognosis or predictor ) OR TI prognosis prediction OR AB prognosis prediction OR TI ( prognosis or outcome or survival ) OR AB ( prognosis or outcome or survival ) OR TI ( predict or predictors or predictive or prediction ) OR AB ( predict or predictors or predictive or prediction )                                                                                                                                                                                                                                                                                                                                                    |  |
| S11<br>#3 | S9 OR S10<br>TI prediction model OR AB prediction model OR TI ( prediction or predictive or predictors ) OR TI ( prediction or predictive or predictors ) OR TI forecasting OR AB forecasting OR TI predictive model OR AB predictive model OR TI predictive modeling OR AB predictive modeling OR TI prediction model OR AB prediction model OR TI prognostic factors OR AB prognostic OR TI prognostication OR AB prognostication OR TI ( prognosis or predictor ) OR AB ( prognosis or predictor ) OR TI prognosis prediction OR AB prognosis prediction OR TI ( prognosis or outcome or survival ) OR AB ( prognosis or outcome or survival ) OR TI ( predict or predictors or predictive or prediction ) OR AB ( predict or predictors or predictive or prediction ) |  |
| S12       | TI ( stillbirth or still birth or intrauterine death or perinatal death or fetus death or foetus death ) OR AB ( stillbirth or still birth or intrauterine death or perinatal death or fetus death or foetus death ) OR TI ( preterm birth or premature birth or preterm labor or preterm delivery or prematurity ) OR AB ( preterm birth or premature birth or preterm labor or preterm delivery or prematurity ) OR TI preterm labor OR AB preterm labor OR TI preterm delivery OR AB preterm delivery OR TI low birth weight OR AB low birth weight OR TI LBW OR AB LBW                                                                                                                                                                                                |  |
| S13       | TI small-for-gestational age OR AB small-for-gestational age OR TI small for gestational age OR AB small for gestational age OR TI SGA OR AB SGA OR TI fetal growth restriction OR AB fetal growth restriction                                                                                                                                                                                                                                                                                                                                                                                                                                                                                                                                                            |  |

|           |                                                                                                                                                                                                                                                                                                                                                                                                                                                                                                                                                                                                                                                                                                                                                                                                                |                                                       |
|-----------|----------------------------------------------------------------------------------------------------------------------------------------------------------------------------------------------------------------------------------------------------------------------------------------------------------------------------------------------------------------------------------------------------------------------------------------------------------------------------------------------------------------------------------------------------------------------------------------------------------------------------------------------------------------------------------------------------------------------------------------------------------------------------------------------------------------|-------------------------------------------------------|
| S14<br>#4 | S12 OR S13<br><br>TI ( stillbirth or still birth or intrauterine death or perinatal death or fetus death or foetus death ) OR AB ( stillbirth or still birth or intrauterine death or perinatal death or fetus death or foetus death ) OR TI ( preterm birth or premature birth or preterm labor or preterm delivery or prematurity ) OR AB ( preterm birth or premature birth or preterm labor or preterm delivery or prematurity ) OR TI preterm labor OR AB preterm labor OR TI preterm delivery OR AB preterm delivery OR TI low birth weight OR AB low birth weight OR TI LBW OR AB LBW OR TI small-for-gestational age OR AB small-for-gestational age OR TI small for gestational age OR AB small for gestational age OR TI SGA OR AB SGA OR TI fetal growth restriction OR AB fetal growth restriction |                                                       |
| S15       | S4 AND S8 AND S11 AND S14<br><br>Filter by English                                                                                                                                                                                                                                                                                                                                                                                                                                                                                                                                                                                                                                                                                                                                                             | 13,000<br>Wednesday,<br>February 25, 2022<br>11:05 PM |
|           | Google scholar                                                                                                                                                                                                                                                                                                                                                                                                                                                                                                                                                                                                                                                                                                                                                                                                 |                                                       |
|           | Prognostic prediction models for adverse birth outcomes, low birth weight, preterm, still birth                                                                                                                                                                                                                                                                                                                                                                                                                                                                                                                                                                                                                                                                                                                | 1017<br>February 25,<br>2022<br>Time 10:05 AM         |
|           | Others (WorldCat, AJOL, Hinary, Registry)                                                                                                                                                                                                                                                                                                                                                                                                                                                                                                                                                                                                                                                                                                                                                                      | 342<br>February 25,<br>2022<br>Time 11:00 AM          |
|           | Total: 60,194<br><ul style="list-style-type: none"> <li>Data bases =58,835</li> <li>Registers (google scholar + others) =1359</li> </ul>                                                                                                                                                                                                                                                                                                                                                                                                                                                                                                                                                                                                                                                                       |                                                       |
|           | Duplication removal<br><ul style="list-style-type: none"> <li>Duplication records=15 184</li> <li>Screening articles by TAB (ongoing)</li> <li>Searching and appraisal of articles for SR (Preparing checklist</li> </ul>                                                                                                                                                                                                                                                                                                                                                                                                                                                                                                                                                                                      |                                                       |

**Table S2: Study characteristics prediction models for low birth weight**

| Study | Country | Study Design | Center | Study Population | Outcome | Sample Size | Outcome(N ) | Incidence | Events Per Variable | Number of predictors | Model Type | Model Analysis |
|-------|---------|--------------|--------|------------------|---------|-------------|-------------|-----------|---------------------|----------------------|------------|----------------|
|-------|---------|--------------|--------|------------------|---------|-------------|-------------|-----------|---------------------|----------------------|------------|----------------|

|                                    |                |                           |                  |                                                                                 |                  | Develop<br>ment | Validat<br>ion |              |              |              |                                                                                                                                                                                                       |                              |                     |  |
|------------------------------------|----------------|---------------------------|------------------|---------------------------------------------------------------------------------|------------------|-----------------|----------------|--------------|--------------|--------------|-------------------------------------------------------------------------------------------------------------------------------------------------------------------------------------------------------|------------------------------|---------------------|--|
| Hange et al., 2018 (1)             | USA            | Cross-Sectional           | Population Based | Women Neonates                                                                  | Low Birth Weight | 10,000          | Not reported   | Not reported | Not reported | Not reported | Gestational age, residence, sex, race of child, Education, Number of babies dead, Termination, Parity, Smoking, Weight Gained, Other medical conditions, Induction of labor, Cesarean section and BMI | Derivation                   | Machine Learning    |  |
| Hassen et al., 2020 (2)            | Ethiopia       | Prospective Cohort        | Population Based | Pregnant Women                                                                  | Low Birth Weight | 379             | Not reported   | 83           | 21.9%        | 13.8         | Age at pregnancy, Underweight, Anemia, Height, Gravidity, Presence of comorbidity                                                                                                                     | Derivation                   | Logistic Regression |  |
| Hernandez Castro et al., 2021 (3)  | Mexico         | Prospective Cohort        | Single Centered  | All Pregnant Between 24 And 28 Weeks Of Gestation                               | Low Birth Weight | 339             | Not reported   | 19           | 5.6%         | 9.5          | FG < 10 <sup>th</sup> percentile, Null- Parity                                                                                                                                                        | Derivation Incremental Value | Logistic Regression |  |
| Goyal et.al, 2015a (4)             | Greece         | Retrospective Cohort      | Multi-Centered   | 3 <sup>rd</sup> Trimester Pregnancy                                             | Low Birth Weight | 263             | 146            | 30           | 11.4%        | 4.28         | Multi-parous, Race, rape, Primi-Parous, BMI, Prenatal Care Entry > 28 Weeks, Prior Preterm Birth                                                                                                      | Derivation                   | Logistic Regression |  |
| Goyal et.al, 2015b (5)             | USA            | Retrospective Cohort      | Multi Centered   | All Pregnant Women                                                              | Low Birth Weight | 263             | 146            | 30           | 11.4%        | 4.28         | Multi-parous, Race, Rape, Other Medical Conditions, Primi-Parous, Prenatal Care Entry > 28 Weeks, Prior Preterm Birth                                                                                 | Derivation                   | Logistic Regression |  |
| O'Reilly-Green and Divon ,1999 (6) | New York       | Prospective Cohort        | Single Centered  | Prolonged Pregnant Women                                                        | Low Birth Weight | 410             | Not reported   | Not reported | Not reported | Not reported | Fetal Weight                                                                                                                                                                                          | Derivation                   | Logistic Regression |  |
| Griffin et.al, 2018 (7)            | UK And Ireland | Prospective Cohort        | Multi Centered   | 2nd And 3rd Trimester Pregnant                                                  | Low Birth Weight | 274             | 123            | 96           | 35%          | 9.6          | Nephirin, CPA-4a, Sflt-1, Endoglin, PlGF, PlGF S-Flt Ratio, PlGF/Endoglin Ratio, PlGF + CPA-4a PlGF + Nephirin, PlGF + Nephirin + CPA-4a                                                              | Derivation                   | Logistic Regression |  |
| Ryu et al ., 2019 (8)              | South Korea    | Prospective Observational | Single Centered  | Pregnant Women With Singleton Pregnancies ,Who Is Normotensive And Preeclampsia | Low Birth Weight | 140             | 140            | 140          | 40           | Not reported | Serum UA, Total Bilirubin , Hemoglobin                                                                                                                                                                | Derivation                   | Logistic Regression |  |
| Schneuer et al ., 2014 (9)         | Australia      | Prospective Cohort        | Single Centered  | Pregnant Women Attending First Trimester                                        | Low birth weight | 4621            | Not reported   | Not reported | Not reported | Not reported | Angiopietin 1 ,Angiopietin ,Angiopietin 1/Angiopietin 2 Ratio Maternal Age, socio-Economic status, Country Of Birth                                                                                   | Derivation                   | Logistic Regression |  |
| Bartnic                            | German         | Experime                  | Single           | Pregnant                                                                        | Low Birth        | 112             | Not            | 14           | 11.9%        | Not          | Fetal Fibronectin                                                                                                                                                                                     | Derivation                   | Logistic            |  |

|                                         |              |                              |                 |                                                    |                  |       |               |              |              |              |                                                                                                                                        |            |                     |
|-----------------------------------------|--------------|------------------------------|-----------------|----------------------------------------------------|------------------|-------|---------------|--------------|--------------|--------------|----------------------------------------------------------------------------------------------------------------------------------------|------------|---------------------|
| ki et al, 1996 (10)                     | y            | ntal                         | Centered        | Women Between 22 And 35 Weeks                      | Weight           |       | reporte d     |              |              | reported     |                                                                                                                                        |            | Regression          |
| Cohen,et al 2014 (11)                   | USA          | Retrospec tive, Case Control | Single Centered | Women Delivered of A Singleton Gestation           | Low Birth Weight | 2199  |               | 106          | 5%           | Not reported | Pregnancy Associated Plasma Protein A (PAPP-A), Free BHCg, Maternal Serum Alpha Fetoprotein                                            | Derivation | Logistic Regression |
| Sinding et al. , 2017 (12)              | Denmar k     | Prospectiv e Observati onal  | Single Centered | Singleton Pregnancies                              | Low Birth Weight | 97    | Not reporte d | 15           | 15%          | Not reported | Placental T2, uterine Artery Pulsatility Index (UAPI)                                                                                  | Derivation | Logistic Regression |
| Singh et al. ,2014 (13)                 | India        | Case Control                 | Single Centered | LBW Neonates and Normal Birth Weight Infants       | Low Birth Weight | 400   | 100           | 250          | 50%          | 3.3          | Weight Gain, Inadequate Proteins, Previous PTB, Previous LBW Baby, Anemia and Smoking                                                  | Derivation | Logistic Regression |
| Wu et al. , 2021 (14)                   | China        | Cross Sectional              | Multi Centered  | Singleton Live Infants and Their Mothers           | Low Birth Weight | 27233 | Not reporte d | 1667         | 6.1%         | Not reported | Sex, Gestational Age, Education ANC, Occupation, Pregnancy Induced Hypertension, Income, Pesticide, Nutrients                          | Derivation | Logistic Regression |
| Zahirzad a and lavagnan anda ,2021 (15) | Afghanis tan | Cross Sectional              | Single Centered | Both Low Birth Weight and Normal Weight Babies     | Low Birth Weight | 2120  | Not reporte d | 625          | 29.5%        | Not reported | Residence                                                                                                                              | Derivation | Logistic Regression |
| Reeb et al. ,1987 (16)                  | USA          | Cross Sectional              | Single centered | Pregnant women in their seventh month of gestation | Low birth weight | 140   | Not reporte d | 20           | 14%          | Not reported | Prenatal stressful events, Maternal social support, Maternal depression, BMI, Family functioning, bio medical and psychosocial factors | Derivation | Logistic regression |
| Rezaei et al. ,2016 (17)                | Iran         | Cross-sectional              | Single centered | Women and born alive infants                       | Low birth weight | 245   | Not reporte d | Not reported | Not reported | Not reported | Gestational age, rank of birth, type of delivery, sex                                                                                  | Derivation | Logistic regression |

**Table S2: Study characteristics prediction models for low birth weight (continued)**

| Study                             | Model Development                                                                                                                                                                                                    | Model Evaluation                                                     | Internal Validation | External Validation | Calibration   | Model Discrimination (AUC With 95% CI)                                                                                                                                                          | Model Performance | Sensitivity With 95% CI                                                                                                                                                                       | Specificity With 95% CI                                                                                                                                                                             | Handling Of Missing Value | Method Of Handling Missing Value | Model Selection                     | Handling Of Continuous Data | How Is The Model Presented |
|-----------------------------------|----------------------------------------------------------------------------------------------------------------------------------------------------------------------------------------------------------------------|----------------------------------------------------------------------|---------------------|---------------------|---------------|-------------------------------------------------------------------------------------------------------------------------------------------------------------------------------------------------|-------------------|-----------------------------------------------------------------------------------------------------------------------------------------------------------------------------------------------|-----------------------------------------------------------------------------------------------------------------------------------------------------------------------------------------------------|---------------------------|----------------------------------|-------------------------------------|-----------------------------|----------------------------|
| Hange et al., 2018 (1)            | By Using Registry Data Model Was Developed Before Balancing And After Balancing. The Study Uses Correlation-Based Feature Selection Algorithm (CFS) Model Was Built With J48 Decision Tree, REPTree And Random Tree. | -AUC<br>-Sensitivity<br>-Specificity                                 | Not reported        | Not reported        | No            | -Before J48=0.599(NR, NR)<br>Reduced-error pruning tree(REPTree)=0.629(NR, NR)<br>-Random Tree=0.518(NR, NR)<br>-After J48=0.903(NR, NR)<br>REPTree=0.884(NR, NR)<br>-Random Tree=0.853(NR, NR) | Yes               | -Before Data Balancing J48=36.8%(NR, NR)<br>REP Tree=39.2 % (NR, NR)<br>Random Tree=28.6%(NR, NR)<br>After Balancing J48=66.3% (NR, NR)<br>REPTree=61.7%(NR, NR)<br>Random Tree=65 % (NR, NR) | Before Data Balancing J48=74.9%(NR, NR)<br>REPTree=73.4% (NR, NR)<br>Random Tree=74.7% (NR, NR)<br>-After Data Balancing J48=95.4% (NR, NR)<br>REPTree=94.9% (NR, NR)<br>Random Tree=95.5% (NR, NR) | Yes                       | Single Regression Imputation     | Correlation-Based Feature Selection | Kept Linear                 | Not reported               |
| Hassen et al., 2020 (2)           | The Model Developed Using Prospective Cohort Pregnant Women. Develop A Simplified Risk Score and Evaluated By AUC And Calibration Plot. Use Bootstrapping Technique And A Decision Curve Analysis Was Done           | -AUC<br>Calibration Plot<br>Sensitivity<br>Specificity<br>PPV<br>NPV | Bootstrapping       | No                  | P-Value; 0.98 | 0.83(0.779, 0.879)                                                                                                                                                                              | Yes               | 73 % (60%, 81%)                                                                                                                                                                               | 82 % (77%, 86%)                                                                                                                                                                                     | Yes                       | Multiple Imputation              | Stepwise Backward Selection         | Categorized                 | Risk Score                 |
| Hernandez Castro et al., 2021 (3) | The Model Was Developed By Doing Multivariate Logistic Regression Analysis Used Goodness-Of-Fit Using X2 Wald,                                                                                                       | AUC<br>Sensitivity<br>Specificity<br>NPV<br>PPV                      | Not reported        | Not reported        | Not reported  | -Null Parity =0.60(0.55,0.65)<br>-FG < 10 <sup>th</sup> = 0.69(0.59,0.70).<br>-Combined =0.72(0.67,0.77)                                                                                        | Yes               | For Null-Parity =67.61% For FG < 10 <sup>th</sup> = 44.13% For Combined=23.53%                                                                                                                | For Null-Parity=52.15% For FG < 10 <sup>th</sup> =85.29% For Combined =93.44%                                                                                                                       | Not reported              | N/A                              | Not reported                        | Categorized                 | Prediction Rule            |



|                                    |                                                                                                                          |                               |               |              |              |                                                                     |     |                     |                   |              |                                            |                                                                                 |              |                                            |  |
|------------------------------------|--------------------------------------------------------------------------------------------------------------------------|-------------------------------|---------------|--------------|--------------|---------------------------------------------------------------------|-----|---------------------|-------------------|--------------|--------------------------------------------|---------------------------------------------------------------------------------|--------------|--------------------------------------------|--|
|                                    | Their Predictive Capacity Was Determined By Area Under The Curve (AUC) Analysis.                                         |                               |               |              |              |                                                                     |     |                     |                   |              |                                            |                                                                                 |              |                                            |  |
| Goyal et.al, 2015a (4)             | Not reported                                                                                                             | AUC                           | Splitting     | No           | No           | 0.63(NR, NR)                                                        | Yes | 29%                 | 80%               | Not reported | N/A                                        | Stepwise Selection (Forward Selection Followed By Series Of Backward Selection) | Categorized  | Risk Score Chart                           |  |
| Goyal et.al, 2015b (5)             | Use Stepwise Elimination Of Variable To Develop Model                                                                    | AUC                           | Splitting     | No           | Not reported | 0.63(NR, NR)                                                        | Yes | 29%                 | 82%               | Yes          | Complete Case Analysis Multiple Imputation | Stepwise Selection (Forward Selection Followed By Series Of Backward Selection) | Categorized  | Risk Score                                 |  |
| O'Reilly-Green and Divon ,1999 (6) | Model Develop By Collecting Data From Neonates And Evaluated                                                             | AUC Sensitivity Specificity   | Not reported  | No           | Not reported | 0.961(NR, NR)                                                       | Yes | 94.1%               | 88.30%            | Not reported | N/A                                        | Not reported                                                                    | Kept Linear  | Regression Coefficients                    |  |
| Griffin et.al, 2018 (7)            | To Develop The Model Use Stepwise Logistic Regression For Bio Markers                                                    | AUC, Sensitivity, Specificity | Splitting     | No           | Not reported | 0.83(NR, NR)                                                        | Yes | 89.7% (91.7%,94.7%) | 58.7% (51.1%,66%) | Yes          | Complete Case Analysis                     | Stepwise Selection (Forward Selection Followed By Series Of Backward Selection) | Kept Linear  | Prediction Rule                            |  |
| Ryu et al . , 2019 (8)             | The Model Was Developed from Preeclampsia And Normal Pregnant Women With Uric Acid As A Predictor                        | AUC Sensitivity Specificity   | Bootstrapping | No           | Not reported | 0.902 (0.817, 0.986)                                                | Yes | 58%                 | 95%               | No           | N/A                                        | Not reported                                                                    | Kept Linear  | Model Formula with Regression Coefficients |  |
| Schneuer et al. , 2014 (9)         | The Model Was Developed From Maternal Characteristics Like Age, Weight, Country Of Birth, Socio Economic Status With The | AUC Sensitivity Specificity   | Not reported  | Not reported | Not reported | Ang-1/Ang-2 Ratio; 0.70 (NR, NR) Maternal Risk Factors 0.58(NR, NR) | Yes | <10%                | Not reported      | Yes          | Multiple Imputation                        | Not reported                                                                    | Not reported | Algorithm                                  |  |

|                             |                                                                                                                                                                                                                          |                              |              |              |              |                                                                                               |     |                                                                   |                                                                       |     |                        |                                                                                 |             |                         |
|-----------------------------|--------------------------------------------------------------------------------------------------------------------------------------------------------------------------------------------------------------------------|------------------------------|--------------|--------------|--------------|-----------------------------------------------------------------------------------------------|-----|-------------------------------------------------------------------|-----------------------------------------------------------------------|-----|------------------------|---------------------------------------------------------------------------------|-------------|-------------------------|
|                             | Above Predictors                                                                                                                                                                                                         |                              |              |              |              |                                                                                               |     |                                                                   |                                                                       |     |                        |                                                                                 |             |                         |
| Bartnic ki et al, 1996 (10) | The Model Develops By Fibronectin To Predict LBW                                                                                                                                                                         | Sensitivity Specificity      | Not reported | Not reported | Not reported | Not reported                                                                                  | Yes | 85.7%                                                             | 75.9%                                                                 | No  | N/A                    | Stepwise Selection (Forward Selection Followed by Series of Backward Selection) | Kept Linear | Regression Coefficients |
| Cohen.et al 2014 (11)       | The Model Develops From Pregnancy Associated Proteins                                                                                                                                                                    | AUC Sensitivity, Specificity | Not reported | Not reported | Not reported | 0.70(NR.NR)                                                                                   | Yes | 69%                                                               | 63%                                                                   | Yes | Complete Case Analysis | Univariable And Multivariable Logistic Regression                               | Kept Linear | Regression Coefficients |
| Sinding et al., 2017 (12)   | The Model Was Developed By Placental T2* And The Uterine Artery (Uta) Pulsatility Index (PI) As Predictors Of Low Birth Weight Measured By Gradient Recalled Multi-Echo MRI Sequence And Doppler Ultrasound Respectively | AUC Sensitivity Specificity  | Not reported | Not reported | Not reported | -Placenta T2= 0.92(0.85,0.98)<br>Uta PI = 0.74(0.60,0.89)                                     | Yes | Placenta T2= 93 % (68%, 100%)<br>Uta PI Z-Score 60 % (32%, 84%)   | Placenta T2; 87% (77%, 93%)<br>Uta=83 % (73%, 90%)                    | No  | N/A                    | Not reported                                                                    | Kept Linear | Prediction Rule         |
| Singh et al., 2014 (13)     | The Model Was Developed By Splitting Samples For Development And Validation 400 And 100 Respectively Starting From Cases Versus Control Ask Back To The Exposure                                                         | AUC Sensitivity Specificity  | Splitting    | Not reported | Not reported | 0.79(NR.NR)                                                                                   | Yes | At Cut-Off Score 29.25 = 71.6 %, For A Score Of 24.75 =73.7 %     | At Cut-Off Score 29.25 = 67.0 %., For A Score Of 24.75 =64 %,         | No  | N/A                    | Not reported                                                                    | Kept Linear | Risk Score Chart        |
| Wu et al., 2021 (14)        | The Model Was Developed By Comparing Trans Vaginal And Trans Perennial Sonographic To Predict Preterm Delivery By Examining At 24                                                                                        | AUC Sensitivity Specificity  | Not reported | Not reported | Not reported | For Trans Vaginal Sonographic=0.801(NR, NR)<br>For Trans Perennial Sonographic= 0.857(NR, NR) | Yes | Trans Vaginal Sonographic=72%<br>Trans Perennial Sonographic= 77% | Trans Vaginal Sonographic=81.8%<br>Trans Perennial Sonographic= 82.7% | No  | N/A                    | Not reported                                                                    | Kept Linear | Algorithm               |

|                                        |                                                                                                                 |                         |              |              |              |                                         |     |              |              |     |                              |                            |             |                         |  |
|----------------------------------------|-----------------------------------------------------------------------------------------------------------------|-------------------------|--------------|--------------|--------------|-----------------------------------------|-----|--------------|--------------|-----|------------------------------|----------------------------|-------------|-------------------------|--|
|                                        | Weeks Gestation                                                                                                 |                         |              |              |              |                                         |     |              |              |     |                              |                            |             |                         |  |
| Zahirzada and lavagnana nda ,2021 (15) | The Model Was Developed By Using Afghanistan DHS Data To Predict LBW At Residence Classification Urban Vs Rural | AUC                     | Not reported | Not reported | Not reported | Rural=0.91(NR, NR)<br>Urban=0.92(NR,NR) | No  | Not reported | Not reported | Yes | Single Regression Imputation | Not reported               | Categorized | Algorithm               |  |
| Reeb et al. ,1987 (16)                 | The model was developed from demographic, bio medical and psychosocial factors in urban black pregnant women    | Sensitivity Specificity | Not reported | Not reported | Not reported | Not Reported                            | Yes | 65%          | 84%          | No  | N/A                          | Stepwise forward selection | Categorized | Regression coefficients |  |
| Rezaei et al. ,2016 (17)               | The model was developed from maternal and infant characteristics                                                | AUC and sensitivity     | Not reported | Not reported | Not reported | 0.888(NR, NR)                           | Yes | 85.50%       | 90.9%        | No  | N/A                          | Stepwise forward selection | Kept linear | regression coefficients |  |

**Table S3: Study characteristics prediction models for preterm birth**

| Study                  | Country | Study Design              | Center         | Study Population                    | Outcome       | Sample Size |              | Outcome(N)                                          | Incidence | Events Per Variable                                     | Number Of Predictors                                                            | Model Type          | Model Analysis            |
|------------------------|---------|---------------------------|----------------|-------------------------------------|---------------|-------------|--------------|-----------------------------------------------------|-----------|---------------------------------------------------------|---------------------------------------------------------------------------------|---------------------|---------------------------|
|                        |         |                           |                |                                     |               | Development | Validation   |                                                     |           |                                                         |                                                                                 |                     |                           |
| Owen et al, 1990 (18)  | USA     | Prospective Follow Up     | Single Center  | Singleton Gestations Pregnant Women | Preterm Birth | 7478        | Not reported | 1122                                                | 16.4 %    | For PTB LRG=7.1<br>HRG=16.4<br>VLPTB LRG=1.6<br>HRG=4.7 | Pre-Pregnancy Weight gain                                                       | Derivation          | Logistic Regression       |
| Carter,et al 2020 (19) | UK      | Prospective Cohort        | Multi-Center   | 2nd & 3rd Trimester Pregnant Women  | Preterm Birth | 1032        | 506          | <30 Weeks = 22<br><34 Weeks = 60<br><37 Weeks = 144 | 12.3%     | <30 Weeks= 4.4<br><34 Weeks = 12<br><37 Weeks = 28.8    | Previous PTB/PPROM, Previous Late Miscarriage, Cervical Surgery, Twin Pregnancy | External Validation | Parametric Survival Model |
| Celik et.al, 2008 (20) | UK      | Prospective Observational | Multi – Center | 2nd Trimester Pregnancy             | Preterm Birth | 58807       | Not reported | 3237                                                | 0.99%     | 539.5                                                   | Race, BMI, Smoking, Previous preterm labor, Cervical Length                     | Incremental Value   | Logistic Regression       |

|                                      |         |                                           |                  |                                                       |               |         |              |                                        |        |              |                                                                                                                                            |               |                                |                                               |
|--------------------------------------|---------|-------------------------------------------|------------------|-------------------------------------------------------|---------------|---------|--------------|----------------------------------------|--------|--------------|--------------------------------------------------------------------------------------------------------------------------------------------|---------------|--------------------------------|-----------------------------------------------|
| Crane and Hutchens 2008 (21)         | Canada  | Retrospective Cohort                      | Single Center    | 2nd & 3rd Trimester Pregnancy                         | Preterm Birth | 90      | 103          | 11                                     | 12.22% | 2.2          | Gravidity, Bleeding, Hydramnios                                                                                                            | Parity, Poly- | Impact Study                   | Logistic Regression                           |
| Damaso et.al, 2019 (22)              | Brazil  | Retrospective Cohort                      | Single Center    | 1st Trimester Pregnancy                               | Preterm Birth | 1323    | Not reported | 110                                    | 8.31%  | 55           | Smoking, Spontaneous PTB                                                                                                                   |               | External Validation            | Logistic Regression                           |
| He et al., 2018 (23)                 | China   | Prospective Cohort                        | Multi-Center     | Pregnant Women Who Attended Their First ANC(16 Weeks) | Preterm Birth | 9044    | Not reported | 444                                    | 4.9%   | Not reported | Maternal Age, Maternal Height, History of Preterm Delivery, Vaginal Bleeding, Lack of Folic Acid intake                                    |               | Derivation External Validation | Logistic Regression Proportional Hazard Model |
| Hebbar and samjhan a 2006 (24)       | India   | Randomized Prospective Longitudinal Study | Single-Center    | Pregnant Women At 20 - 24 Weeks Of Gestational Age    | Preterm Birth | 168     | Not reported | 13                                     | 7.7%   | 13           | Cervical Length                                                                                                                            |               | Derivation                     | T-Test                                        |
| Hebert et al., 2022 (25)             | USA     | Retrospective Cohort                      | Single Center    | All Women Aged 15 To 44 Who Had A Live Birth          | Preterm Birth | 349,396 | 10,000       | Development N= 6,330 Validation N= 186 | 1.86%  | Not reported | Not reported                                                                                                                               |               | Derivation                     | Logistic Regression                           |
| Newman et al. (26)                   | USA     | Prospective Cohort                        | Multi Center     | Singleton Pregnancies                                 | Preterm Birth | 2916    | Not reported | 127                                    | 4.4%   | Not reported | Maternal Age, BMI, Education, Insurance, Marital Status, Race, Parity, Previous Pre-Term Delivery, Smoking, Alcohol Drinking, Bishop Score |               | Derivation                     | Logistic Regression                           |
| Hellema ns et al., 1995 (27)         | Belgium | Prospective Follow Up                     | Single Center    | Pregnant Women Singleton Gestation                    | Preterm Birth | 133     | Not reported | 10                                     | 8%     | 8            | Cervical Fetal Fibronectin                                                                                                                 |               | Derivation                     | Not reported                                  |
| Fergus et.al, 2013 (28)              | UK      | Retrospective Cohort                      | Single Center    | 2nd & 3rd Trimester Pregnant Women                    | Preterm Birth | 240     | 60           | 38                                     | 12.67% | 38           | Electro-Hysterography (EHG)                                                                                                                |               | Derivation                     | Machine Learning                              |
| Jelliffe-Pawlowski et al., 2018 (29) | USA     | Nested Case Control                       | Population Based | All Women With Singleton Births                       | Preterm Birth | 200     | 200          | 200                                    | 50%    | 7.69         | Gestation Age, Income and Biomarkers                                                                                                       |               | Derivation                     | Logistic Regression                           |
| Goyal et.al, 2015a                   | Greece  | Retrospective Cohort                      | Multi-Center     | 3rd Trimester Pregnancy                               | Preterm Birth | 263     | 146          | 22                                     | 8.4%   | 3.14         | Parity, Race, Rape, BMI, Prenatal Care, Prior Preterm Birth                                                                                |               | Derivation                     | Logistic Regression                           |

|                             |                               |                             |                 |                                                                                              |               |              |              |     |       |              |                                                                                                        |                   |                     |  |
|-----------------------------|-------------------------------|-----------------------------|-----------------|----------------------------------------------------------------------------------------------|---------------|--------------|--------------|-----|-------|--------------|--------------------------------------------------------------------------------------------------------|-------------------|---------------------|--|
| (4)                         |                               |                             |                 |                                                                                              |               |              |              |     |       |              |                                                                                                        |                   |                     |  |
| Jung et al., 2021 (30)      | Korea                         | Prospective Cohort          | Multi Center    | Women With Singleton Pregnancies 16 - 28 Weeks Of Gestation                                  | Preterm Birth | 115          | Not reported | 9   | 0.69% | 2.25         | Mean Internal Os Strain<br>Mean External Os Strain<br>Elasticity Contrast Index                        | Derivation        | Logistic Regression |  |
| Goyal et al., 2015b (5)     | USA                           | Retrospective Cohort        | Multi Centered  | All Pregnant Women                                                                           | Preterm Birth | 263          | 146          | 22  | 8.4%  | 3.14         | parity, Race, Rape, Other Medical Conditions, Prenatal Care Entry, Prior Preterm Birth                 | Derivation        | Logistic Regression |  |
| Nikolova, et al. 2018 (31)  | Finland, Macedonia And Russia | Prospective Observational   | Multi Centered  | Pregnant Women Singleton Gestations                                                          | Preterm Birth | Not reported | 383          | 65  | 16.9% | Not reported | PAMG-1, Phigfbp-1 and Cervical Length                                                                  | Incremental Value | Logistic Regression |  |
| Alleman, et al 2013 (32)    | USA                           | Prospective Cohort          | Not reported    | All Women Undergoing Routine Perinatal Testing in The First Second Trimester                 | Preterm Birth | 2699         | Not reported | 200 | 0.074 | Not reported | TC, Pre-Pregnancy DM, Previous PTB, Previous Live Birth, BMI, maternal AFP, maternal Inhibin A         | Derivation        | Logistic Regression |  |
| Anderson, et al 1990 (33)   | USA                           | Prospective Follow-Up       | Not reported    | Women First Seen for Routine Obstetric Ultrasonography Examination                           | Preterm Birth | 178          | Not reported | 44  | 24.7% | Not reported | -Trans Abdominal Ultrasonography, Endovaginal Ultrasonography and Manual Examination Cervical Length   | Derivation        | Logistic Regression |  |
| Grobman et al., 2016 (34)   | USA                           | Clinical Trial              | Single Centered | 2nd Trimester Pregnant                                                                       | Preterm Birth | 657          | Not reported | 109 | 16.6% | 54.5         | Mean Cervical Length, Presence of Cervical Funneling                                                   | Impact Study      | Logistic Regression |  |
| Park et al., 2021 (35)      | Korea                         | Case Control                | Multi-Centered  | Singleton Pregnant Women with A Gestational Age Between 15 And 34 Weeks                      | Preterm Birth | 94           | Not reported | 38  | 40.4% | Not reported | Bacillus Bacteroidetes, Mollicutes and WBC                                                             | Derivation        | Logistic Regression |  |
| Pasquini et al., 2014 (36)  | Italy                         | Retrospective Observational | Single Centered | Asymptomatic Twin Pregnancies Who Received ANC Ultrasound Examination At 20 And 24 + 6 Weeks | Preterm Birth | 222          | Not reported | 44  | 19.8% | Not reported | Cervical Length                                                                                        | Derivation        | Logistic Regression |  |
| Posthumus et al., 2016 (37) | Netherlands                   | Prospective Cohort          | Multi Centered  | All Pregnant Women                                                                           | Preterm Birth | 836          | Not reported | 101 | 12%   | Not reported | Previous History of PTB, Smoking, Alcohol Drinking, Drug Abuse, Social Support, Family Income, Housing | Derivation        | Logistic Regression |  |

|                                   |          |                                 |                       |                                                                      |               |              |              |                                      |              |                               |                                                                                                                                                                                             |              |                           |
|-----------------------------------|----------|---------------------------------|-----------------------|----------------------------------------------------------------------|---------------|--------------|--------------|--------------------------------------|--------------|-------------------------------|---------------------------------------------------------------------------------------------------------------------------------------------------------------------------------------------|--------------|---------------------------|
|                                   |          |                                 |                       |                                                                      |               |              |              |                                      |              |                               | Condition                                                                                                                                                                                   |              |                           |
| Dziadosz et,al, 2016 (38)         | New York | Retrospective Cohort Study      | Single Centered       | 2nd Trimester                                                        | Preterm Birth | 972          | Not reported | <37 Weeks =84 <34 Weeks = 43         | 9.6%         | <37 Weeks=8.4 <34 Weeks = 4.3 | Prior Spontaneous PTB, Prior Dilation and Curettage , Gestational Age ,Mean CL ,Mean UCA at TVU ,BMI, Cesarean Delivery , NICU Admission                                                    | Not reported | Linear Regression         |
| Prema and pushpala tha ,2019 (39) | India    | Prospective Observational Study | Single Centered       | Pregnant Women Having Who Had DM                                     | Preterm Birth | Not reported | Not reported | 124                                  | Not reported | Not reported                  | Maternal Age, Gravidity, Diabetes, Obesity, Hypertension                                                                                                                                    | Derivation   | Logistic Regression       |
| Garcia – blanco et.al, 2017(40)   | Spain    | Prospective Cohort              | Single Centered       | 2nd And 3rd Trimester                                                | Preterm Birth | 166          | Not reported | 128                                  | 77           | 14.2                          | Parity, Cortisol With Or Without Amylase, maternal Age, Multiple Pregnancy                                                                                                                  | Derivation   | Parametric Survival Model |
| Raba and Kotarski , 2016 (41)     | Poland   | Prospective Observational       | Single Centered       | Pregnant Women                                                       | Preterm Birth | 622          | Not reported | 400                                  | 64.3%        | Not reported                  | Smoking, Socioeconomic Status, Frequent Contractions During Pregnancy, vaginal Bleeding, other medical condition                                                                            | Derivation   | Logistic Regression       |
| Rafael et al. , 2012 (42)         | USA      | Retrospective Cohort            | Single Centered       | Women With A Twin Delivery Who Subsequently Had A Singleton Delivery | Preterm Birth | 255          | Not reported | 18                                   | 7.05%        | Not reported                  | Gestational Age                                                                                                                                                                             | Derivation   | Logistic Regression       |
| Crane et,al, 1999 (43)            | Canada   | Prospective Cohort              | Single Centered       | 2nd Trimester Pregnant                                               | Preterm Birth | 140          | Not reported | 9                                    | 6.4%         | 4.5                           | Preterm Birth-Risk Score, Vaginal Fetal Fibronectin ,FDC-6                                                                                                                                  | Impact Study | Logistic Regression       |
| Baer et al 2018 (44)              | USA      | Retrospective Cohort            | Birth Cohort Database | First Trimester Pregnant                                             | Preterm Birth | 1,559,797    | 779,899      | Training = 102, 947 Testing = 51,473 | 6.6%         | Not reported                  | Race, Age, Education, Parity, Country of birth, BMI, Diabetes, Hypertension, smoking, Drug Abuse, Mental Illness, Anemia, Previous Cesarean Delivery, Previous PTB, Interpregnancy Interval | Derivation   | Logistic Regression       |
| Riboni et al. ,2011 (45)          | Italy    | Prospective Cohort              | Multi Centered        | Women A Singleton Pregnancy At 24-34 Weeks                           | Preterm Birth | 210          | Not reported | 36                                   | 16.2%        | Not reported                  | Phosphorylated Insulin-Like Growth Factor, Bindingprotein-1 Fetal Fibronectin                                                                                                               | Derivation   | Logistic Regression       |
| Banos et al, 2018                 | USA      | Prospective Cohort              | Single Center         | All Women Attending                                                  | Preterm Birth | 749          | Not reported | 29                                   | 5.45%        | Not reported                  | Maternal Age, Cervical Length, Cervical                                                                                                                                                     | Derivation   | Logistic Regression       |

|                               |        |                            |                  |                                                                                                                    |               |            |              |           |        |              |                                                                                                                                                                                                                                                                                                             |                   |                           |
|-------------------------------|--------|----------------------------|------------------|--------------------------------------------------------------------------------------------------------------------|---------------|------------|--------------|-----------|--------|--------------|-------------------------------------------------------------------------------------------------------------------------------------------------------------------------------------------------------------------------------------------------------------------------------------------------------------|-------------------|---------------------------|
| (46)                          |        |                            | d                | Second-Trimester At 19-And 24-Weeks Gestation                                                                      |               |            |              |           |        |              | Consistency Index, Onset of Labor, Mode of Delivery                                                                                                                                                                                                                                                         |                   | n                         |
| Riboni et al., 2012 (47)      | Italy  | Prospective Cohort         | Single Centered  | Asymptomatic Pregnant Women 24 Weeks                                                                               | Preterm Birth | 491        | Not reported | 44        | 8.9%   | Not reported | Phosphorylated Insulin-Like Growth Factor, Binding Protein (Phigfbp-1) Test, Cervico-Vaginal Interleukins 6 (IL-6) and 8 (IL-8), Serum C-Reactive Protein                                                                                                                                                   | Derivation        | Logistic Regression       |
| Kim et al., 2011 (48)         | Korea  | Retrospective Chart Review | Single Centered  | Patients Diagnosed With Preterm Labour                                                                             | Preterm Birth | 175        | Not reported | 102       | 58.29% | 11.33        | WBC, CRP, NLR, Cervix Length and Combined, marker (Cervical Length and NLR)                                                                                                                                                                                                                                 | Derivation        | Proportional Hazard Model |
| Balardi, et al 2016 (49)      | Italy  | Exploratory Study          | Multi Centered   | Mothers Who Had Undergone An Amniocentesis Between 21 And 28 Gestational Weeks                                     | Preterm Birth | 32         | Not reported | 13        | 40.6%  | Not reported | Gestational age, Sex, Birth Weight, Cesarean Section, Maternal Age, BMI, Smoking, Ethnicity, Previous Miscarriages, Trans-Abdominal Amniocentesis, Maternal Therapy at Amniocentesis                                                                                                                        | Derivation        | Discriminant Analysis     |
| Ridout et al., 2019 (50)      | London | Retrospective Cohort       | Multi Centered   | Pregnant Women With Asymptomatic High-Risk Women With Congenital Uterine Anomaly                                   | Preterm Birth | 318        | Not reported | 56        | 18     | Not reported | Cervical Length Fetal Fibronectin                                                                                                                                                                                                                                                                           | Incremental       | Not reported              |
| Gioan et.al, 2018 (51)        | France | Prospective Cohort         | Multi Centered   | All Pregnant Women                                                                                                 | Preterm Birth | 813        | Not reported | 24        | 10.9%  | 4.8          | History of PTB/PROM, Gestational Age, Cervical Length, Day Travel Time > 30 Minutes                                                                                                                                                                                                                         | Incremental Value | Logistic Regression       |
| Koivu and sairanen, 2020 (52) | USA    | Cross Sectional            | Population Based | Infant Birth And Death Data Sets Containing Pregnancies During The Years CDC, National Center Of Health Statistics | Preterm Birth | 15,883,784 | 363,560      | 1,532,538 | 9.6%   | Not Stated   | Maternal Age, Race, Marital Status, Education, previous PTB, Special Supplemental Nutrition Program, Smoking, BMI, Height, Weight, Parity, Pre-Pregnancy Diabetes, Pre-Pregnancy Hypertension, Infertility Treatment, Assisted Reproductive Technology, Previous Cesarean Sections, other medical condition | Derivation        | Logistic Regression       |
| Barinov et al .               | Russia | Retrospective              | Single Center    | Women With Singleton And                                                                                           | Preterm Birth | 420        | Not reported | 420       | 100%   | Not reported | Phosphorylated Insulin-Like Growth Factor                                                                                                                                                                                                                                                                   | Incremental Value | Logistic Regression       |

|                               |         |                                               |                 |                                                                                                                                                        |               |        |              |                                                     |        |              |                                                                                                                                             |                     |                           |
|-------------------------------|---------|-----------------------------------------------|-----------------|--------------------------------------------------------------------------------------------------------------------------------------------------------|---------------|--------|--------------|-----------------------------------------------------|--------|--------------|---------------------------------------------------------------------------------------------------------------------------------------------|---------------------|---------------------------|
| 2021<br>(53)                  |         | Cohort<br>And<br>Prospective<br>Observational | d               | Twin<br>Pregnancies<br>Between 24 And<br>33 + 6 Weeks Of<br>Gestation                                                                                  |               |        |              |                                                     |        |              | Binding Protein-1 (Phigfb-1), Placental Alpha Macroglobulin-1(PAMG-1)                                                                       |                     | n                         |
| Kuhr et al, 2016<br>(54)      | UK      | Prospective Follow up                         | Multi Centered  | Women With A Singleton Pregnancy 22+0 And 35+6weeks                                                                                                    | Preterm Birth | 190    | 192          | 49                                                  | 13%    | 24.5         | Fetal Fibronectin and Previous PTB/PPROM                                                                                                    | Derivation          | Parametric Survival Model |
| Rohlfing et al, 2020<br>(55)  | USA     | Case Control                                  | Single Centered | All Pregnant Women Singleton Birth                                                                                                                     | Preterm Birth | 868    | Not reported | 411                                                 | 47.35% | Not reported | Hypertension, Diabetes Mellitus, Total Cholesterol(HDL,LDL,TC, TG),Smoking "                                                                | Derivation          | Logistic Regression       |
| Bartnicki et al, 1996<br>(10) | Germany | Experimental                                  | Single Centered | Pregnant Women Gestational Age Between 22 Weeks And 35 Weeks,                                                                                          | Preterm Birth | 112    | Not reported | 40                                                  | 35.7%  | Not reported | Fetal Fibronectin                                                                                                                           | Derivation          | Logistic Regression       |
| Bastek et al, 2012<br>(56)    | USA     | Prospective Cohort                            | Single Centered | Singleton Pregnancies At 22-33 Weeks Of Gestation                                                                                                      | Preterm Birth | 583    | Not reported | Delivery Within 10 Days =90 , Before 37 Weeks = 204 | 35.0%  | Not reported | Cervical Dilatation ,Prenatal Care, smoking and Obstetric History                                                                           | Derivation          | Logistic Regression       |
| Saade et al, 2016<br>(57)     | USA     | Nested Case Control Cohort                    | Multi Centered  | Pregnant Women Between 17 And 28 Weeks Gestational Weeks                                                                                               | Preterm Birth | N/A    | 4825         | 533                                                 | 11.04% | Not reported | -Insulin-Like Growth Factor-Binding Protein 4 (IBP4) ,Sex Hormone Binding Globulin (SHBG)                                                   | External Validation | Logistic Regression       |
| Lee et al., 2011<br>(58)      | Korea   | Prospective cohort                            | Single centered | women who delivered singleton live newborns from 24 to 42 weeks of gestation at Ewha Womans University Hospital in Seoul, Korea, between 2003 and 2010 | Preterm birth | 522    | Not reported | 96                                                  | 18.4%  | 9.6          | Maternal age, BMI, Gestational age , parity, Prior preterm birth, Maternal education, Paternal education, cervix length , fetal fibronectin | Derivation          | Logistic regression       |
| Arabi Belaghi et al,          | Canada  | Population-Based Retrospective                | Single Centered | All Nulliparous Women With Singleton Births                                                                                                            | Preterm Birth | 75,809 | 37,654       | 6,955                                               | 6.2%   | Not reported | Diabetes, Abnormal Pregnancy-Associated Plasma Protein A                                                                                    | Derivation          | Logistic Regression       |



|                               |           |                      |                 |                                                                                             |               |              |              |                                  |              |                                                     |                                                                                                                                                                                                                                                                                                             |            |                                          |
|-------------------------------|-----------|----------------------|-----------------|---------------------------------------------------------------------------------------------|---------------|--------------|--------------|----------------------------------|--------------|-----------------------------------------------------|-------------------------------------------------------------------------------------------------------------------------------------------------------------------------------------------------------------------------------------------------------------------------------------------------------------|------------|------------------------------------------|
| 2021<br>(59)                  |           | tive Cohort          |                 | Who Gave Birth Between 20 And 42 Weeks Gestation                                            |               |              |              |                                  |              |                                                     | .Pregnancies Conceived By IVF, Being Obese, drug Use, Lower Neighborhood Education, Neighborhood Immigration , Maternal Height, Other health Conditions., obstetric history, Sex, Prenatal care                                                                                                             |            |                                          |
| Schmitz et al. , 2008<br>(60) | France    | Prospective Cohort   | Single Centered | Pregnant Women In Preterm Labor Between 24 And 34 Weeks Gestation.                          | Preterm Birth | 395          | Not reported | Within 48 Hour 17 and 7 days 32  | 8.1% ,       | Not reported                                        | Bishop Score Cervical Length                                                                                                                                                                                                                                                                                | Derivation | Logistic Regression                      |
| Lee et al., 2020<br>(61)      | Korea     | Retrospective Cohort | Multi Centered  | Pregnant Women Between 16 And 34 Gestational Weeks                                          | Preterm Birth | 727          |              | 452                              | 62.2%        | 53.3                                                | Pelvic Fall Down Sensation, Regular Physical Activity, Feeling of Uterine Contraction, Maternal Weight, History of Cerclage, Vaginal Bleeding, C- Reactive Proteins Level, other medical condition, Sleep Quality, WBC, Alcohol Drinking, Gestational Age, Rupture of Amniotic Membrane, Multiple Pregnancy | Derivation | Logistic Regression                      |
| Menon et al ,2014<br>(62)     | USA       | Case Control         | Single Centered | Pregnant Women Between The Ages Of 18 And 40 Years                                          | Preterm Birth | Not reported | Not reported | Not reported                     | Not reported | Not reported                                        | In African Americans - Maternal Plasma Samples IL-1RA, TNF-A, Angiopietin 2, TNFRI, IL-5, MIP1a, IL-1b and, TGF-A<br>In Caucasians - TNFR1, ICAM-1 and IL-1RA                                                                                                                                               | Derivation | Multivariate Adaptive Regression Splines |
| Lee et al., 2015<br>(63)      | Korea     | Retrospective Cohort | Not reported    | Women With A Viable Twin Pregnancy At 15 To 20 Weeks Of Gestation                           | Preterm Birth | 192          | Not reported | 34                               | 17.70%       | 17                                                  | Amniotic Fluid IL-8 and MMP-9                                                                                                                                                                                                                                                                               | Derivation | Not reported                             |
| Leow et al., 2020<br>(64)     | Australia | Prospective Cohort   | Multi Centered  | Pregnant Women Attending ANC Asymptomatic Women Of At Least 18 Years Of Age And 16-24 Weeks | Preterm Birth | 136          | 150          | Development 12 and validation=11 | 8.04%        | 3.29 (1.71 For Development And 1.57 For Validation) | IL-1RA, VDBP, TIMP-1, PEDF, GGH, LAMC2, ECM1                                                                                                                                                                                                                                                                | Derivation | Not reported                             |

|                                |                  |                             |                 | Gestational Age                                                                                                                             |               |        |              |       |        |              |                                                                                                                                                                 |                     |                           |
|--------------------------------|------------------|-----------------------------|-----------------|---------------------------------------------------------------------------------------------------------------------------------------------|---------------|--------|--------------|-------|--------|--------------|-----------------------------------------------------------------------------------------------------------------------------------------------------------------|---------------------|---------------------------|
| Cohen et al., 2014 (11)        | USA              | Retrospective, Case Control | Single Centered | Women Delivered Of A Singleton Gestation                                                                                                    | Preterm Birth | 2199   | Not reported | 150   | 7%     | Not reported | Pregnancy Associated Plasma Protein A (PAPP-A), Free BHCG and Maternal Serum Alpha Fetoprotein                                                                  | Derivation          | Logistic Regression       |
| Leung et al., 2005 (65)        | China            | Prospective Observational   | Single Centered | Women Attending This Routine Ultrasound Session                                                                                             | Preterm Birth | 2880   | Not reported | 200   | 6.90%  | 1000         | Cervical Length and Funneling                                                                                                                                   | Derivation          | Logistic Regression       |
| Lin et al., 2021 (66)          | USA And Columbia | Not reported                | Single Centered | ART Women From The National Vital Statistics System (NVSS) Participant Use File.                                                            | Preterm Birth | 122430 | Not reported | 15574 | 12.72% | 1198         | Age, Race, BMI, Parity, History of PTB and Cesarean, Birth Interval, Pre-pregnancy Diabetes, Pre-pregnancy Hypertension and Fertility-Enhancing Drugs           | Derivation          | Proportional Hazard Model |
| Liu et al., 2020 (67)          | China            | Retrospective Cohort        | Single Centered | All Women Had Their Delivery At Peking University First Hospital In Beijing, China, From 1 January 2017 To 1 January 2018 With Short Cervix | Preterm Birth | 555    | Not reported | 187   | 33.7%  | 20.78        | BMI, other medical condition, History Of PTB, Twin Pregnancy, IVF-ET, inter pregnancy interval, Gestational Age, Cervical Length and Pre-pregnancy Hypertension | Derivation          | Logistic Regression       |
| Van de Mheen et al., 2014 (68) | Netherlands      | RCT                         | Single Centered | Pregnant Women For AMPHA Drug Trial                                                                                                         | Preterm Birth | 507    | Not reported | 270   | 53%    | Not reported | Cervical Length, Previous Preterm Delivery, Mono Chorionicity, Smoking, Educational Level and twin Pregnancy                                                    | Derivation          | Proportional Hazard Model |
| Yazici et al., 2004 (69)       | Turkey           | Prospective Observational   | Single Centered | Pregnant Women Underwent Trans Vaginal Ultra Sound And Trans Perennial Ultra Sound At 24 Weeks Of Gestation                                 | Preterm Birth | 357    | Not reported | 22    | 6.2%   | Not reported | Trans Vaginal Sonography and trans Perennial Sonography Measuring Cervical Length                                                                               | Derivation          | Logistic Regression       |
| Mueller-Heubach                | USA              | Prospective Cohort          | Single Centered | Patients Registering For                                                                                                                    | Preterm Birth | N/A    | 4591         | 462   | 10.1%  | 92.4         | Pre-Pregnancy Weight gain, race, marital Status                                                                                                                 | External Validation | Logistic Regression       |

|                                    |           |                            |                  |                                                       |               |         |                                                            |                                             |       |              |                                                                                                                                                                   |                                 |                           |
|------------------------------------|-----------|----------------------------|------------------|-------------------------------------------------------|---------------|---------|------------------------------------------------------------|---------------------------------------------|-------|--------------|-------------------------------------------------------------------------------------------------------------------------------------------------------------------|---------------------------------|---------------------------|
| Guzick., 1989 (70)                 |           |                            | d                | Prenatal Care                                         |               |         |                                                            |                                             |       |              |                                                                                                                                                                   |                                 | n                         |
| Mortensen et al., 1987 (71)        | Sweden    | Prospective Cohort         | Not reported     | Women Who Were Delivered                              | Preterm Birth | 1327    | Not reported                                               | 43                                          | 3.20% | 21.5         | Bishop Cervical Score and Dilatation                                                                                                                              | Derivation                      | Not reported              |
| Morken et al., 2014 (72)           | Sweden    | Prospective Cohort         | Population Based | Women Born Spontaneous Onset Of Delivery              | Preterm Birth | 448,852 | 430,139 (Primiparous (190 936) And Multiparous (N239 203)) | 8569 In Primiparous and 6489 In Multiparous | 4.3%  | Not reported | BMI, Smoking, Pre-Existing Diabetes, Hypertension, gestational age, sex, fetal complication, Pregnancy Bleeding, Previous Spontaneous Abortions.                  | Derivation                      | Logistic Regression       |
| Zhang et al., 2021 (73)            | China     | Case Control               | Single Centered  | Twin Pregnant Women Between 22-24 And 26-28 Gestation | Preterm Birth | 309     | 178                                                        | 173                                         | 56%   | Not reported | Parity, Monotonicity Pre Pregnancy's BMI Previous Preterm Birth, Cervical Length, Shortening Rate                                                                 | Derivation                      | Logistic Regression       |
| Macdonald - wallis et al 2015 (74) | UK        | Prospective Cohort         | Multi Centered   | 3rd Trimester Pregnancy                               | Preterm Birth | 12996   | 3005                                                       | 702                                         | 5.4%  | 70           | BMI, Height, Age, Parity, Smoking, previous existing Hypertension and Diabetes, Ethnicity                                                                         | Derivation                      | Not reported              |
| Mailath - pokorny et al, 2015 (75) | Australia | Prospective Cohort         | Single Centered  | 2nd Trimester Pregnancy                               | Preterm Birth | 617     | Not reported                                               | 300                                         | 48.6% | 100          | Preterm PROM, Cervical Length, CPR                                                                                                                                | Derivation; External Validation | Logistic Regression       |
| McLean et al, 1999 (76)            | Australia | Prospective Cohort         | Single Centered  | 1st And 2nd Trimester                                 | Preterm Birth | 860     | Not reported                                               | 60                                          | 70    | 30%          | Concentrations of Corticotrophin-Releasing Hormone, Fetoprotein                                                                                                   | Derivation                      | Not reported              |
| Watson et al., 2020 (77)           | UK        | Prospective Cohort Study   | Multi Centered   | Asymptomatic Singleton Or Twin Pregnancies            | Preterm Birth | 1803    | 904                                                        | 453                                         | 50.1% | Not reported | Quantitative Fetal Fibronectin, Cervical Length                                                                                                                   | Incremental Value               | Proportional Hazard Model |
| Mehta-Lee et al, 2017 (78)         | USA       | retrospective cohort study | Multi centered   | postnatal women                                       | Preterm birth | 192,208 | Not reported                                               | 47654                                       | 9.2%  | 5294.9       | Obstetric history, History of preterm labor, SAB/TAB, maternal diabetes, Race, Ethnicity, smoking, stress over paying bills, intend to get pregnant, maternal age | Derivation                      | Logistic regression       |
| Mendez                             | Spain     | prospective                | Single           | 1st, 2nd and 3rd                                      | Preterm birth | 31      | Not                                                        | 14                                          | 45.2% | 14           | Cervical pessary placement                                                                                                                                        | Derivation                      | paired                    |

|                             |            |                                |                  |                                                                                              |               |           |              |        |       |              |                                                                                                                               |                   |                                              |               |
|-----------------------------|------------|--------------------------------|------------------|----------------------------------------------------------------------------------------------|---------------|-----------|--------------|--------|-------|--------------|-------------------------------------------------------------------------------------------------------------------------------|-------------------|----------------------------------------------|---------------|
| a et.al, 2021 (79)          |            | e observational                | centered         | trimester pregnant women                                                                     |               |           | reported     |        |       |              |                                                                                                                               |                   |                                              | sample t-test |
| Zhu et al .,2017 (80)       | China      | Prospective follow up          | Multi centered   | Pregnant women at 17 to 28+6 weeks                                                           | Preterm birth | 130       | Not reported | 46     | 35.4  | Not reported | History of preterm delivery, pre pregnancy BMI , blue area , mean gray value(Amplitude), cervical dilatation, Cervical length | Derivation        | Logistic regression                          |               |
| Radhouane et al .,2017 (81) | Tunisia    | Prospective longitudinal study | Single centered  | Women with singleton pregnancies                                                             | Preterm birth | 117       | Not reported | 40     | 34.2% | Not reported | Cervical length                                                                                                               | Incremental value | Student t - test and Pearson chi-square test |               |
| Bachkangi et al ,2019 (82)  | UK         | prospective cohort study       | Multi centered   | pregnant women between 24 and 34 gestational week                                            | Preterm birth | 217       | Not reported | 71     | 32.7% | 35.5         | N-arachidonylethanolamine (AEA)<br>N-oleoylethanolamide (OEA)                                                                 | Derivation        | Logistic regression                          |               |
| Szymuski et al .,2011 (83)  | Poland     | Prospective cohort             | Single centered  | Women in singleton pregnancies attending a second trimester scan at 22-24 weeks of gestation | Preterm birth | 451       | Not reported | 100    | 22%   | Not reported | Cervical length , Spontaneous singleton delivery and gestational age                                                          | Derivation        | Logistic regression                          |               |
| Schaaf et al .,2012 (84)    | Netherland | Prospective cohort study       | Population based | Singleton pregnancies                                                                        | Preterm birth | 1,524,058 | 1,524,058    | 57,796 | 3.80% | Not reported | - Previous PTB, Drug abuse, Vaginal bleeding, socio-economic status, parity                                                   | Derivation        | Logistic regression                          |               |

**Table S3: Study characteristics prediction models for preterm birth (continued)**

| Study | Model Development | Model Evaluation | Internal Validation | External Validation | Calibration | Model Discrimination (AUC With 95% CI) | Model Performance | Sensitivity With 95%CI | Specificity 95%CI | With | Handling Of Missio n Value | Method Of Handling Missing Value | Model Selection | Handling Of Continuous Data | How The Model Presented | Is |
|-------|-------------------|------------------|---------------------|---------------------|-------------|----------------------------------------|-------------------|------------------------|-------------------|------|----------------------------|----------------------------------|-----------------|-----------------------------|-------------------------|----|
|-------|-------------------|------------------|---------------------|---------------------|-------------|----------------------------------------|-------------------|------------------------|-------------------|------|----------------------------|----------------------------------|-----------------|-----------------------------|-------------------------|----|

|                             |                                                                                                                                                                   |                              |              |     |              |                     |     |                                                                                  |                                                      |              |                        |                             |              |                                              |
|-----------------------------|-------------------------------------------------------------------------------------------------------------------------------------------------------------------|------------------------------|--------------|-----|--------------|---------------------|-----|----------------------------------------------------------------------------------|------------------------------------------------------|--------------|------------------------|-----------------------------|--------------|----------------------------------------------|
| Owen et al, 1990 (18)       | Not reported                                                                                                                                                      | Not reported                 | Not reported | No  | Not reported | Not reported        | Yes | Delivery <37 Week = 29%<br>Delivery >37 Week = 34%                               | Delivery <37 Week = 0.86<br>Delivery >37 Week = 0.85 | Not reported | N/A                    | Stepwise Backward Selection | Not reported | Not reported                                 |
| Carter, et al 2020 (19)     | Algorithm                                                                                                                                                         | Separate External Validation | N/A          | Yes | Not reported | 0.731 (0.630,0.831) | Yes | 82.6 % ( 75.4%, 88.6%)                                                           | 62.7 % ( 59.6%, 65.6%)                               | No           | N/A                    | AIC & BIC                   | N/A          | Sensitivity, Specificity, PPV, NPV, LR+, LR- |
| Celik et.al, 2008 (20)      | The Model Developed Using Maternal Data By Selecting Variables Backward Stepwise Logistic Regression Using The Wald Test As Robust Standard Errors Were Estimated | AUC                          | Splitting    | No  | Not reported | 0.650(NR,NR)        | Yes | < 28 Weeks= 80.6%<br>28-30 Weeks=58.5%<br>31-33 Weeks=53.0%<br>34-36 Weeks=28.6% | Not reported                                         | Yes          | Complete Case Analysis | Stepwise Backward Selection | Kept Linear  | Regression Coefficients                      |
| Crane and Hutches 2008 (21) | The Model Was Developed By ANOVA For Continuous Variable And Logistic Regression For Ordinal Variables                                                            | AUC                          | Not reported | No  | Not reported | Not Reported        | Yes | 63.6 % ( 33.6%, 87.2%)                                                           | 77.2 % ( 67%, 77.5%)                                 | No           | N/A                    | Not reported                | Kept Linear  | ROC Curve                                    |
| Damaso et.al, 2019 (22)     | The Model Developed From Performance Of A Previously Published Algorithm For First-Trimester Prediction Of Spontaneous Preterm Birth                              | AUC                          | N/A          | Yes | Not reported | 0.67(0.56,0.78)     | Yes | 60.9%                                                                            | 63.2%                                                | Yes          | Complete Case Analysis | Not reported                | Kept Linear  | ROC Curve Sensitivity Specificity            |

|                                |                                                                                                                                                                                                                                                                                                    |                                                   |              |     |                                                      |                 |     |                   |                    |              |                     |                      |              |                    |
|--------------------------------|----------------------------------------------------------------------------------------------------------------------------------------------------------------------------------------------------------------------------------------------------------------------------------------------------|---------------------------------------------------|--------------|-----|------------------------------------------------------|-----------------|-----|-------------------|--------------------|--------------|---------------------|----------------------|--------------|--------------------|
| Hebert et al., 2018 (23)       | The Prediction Model With Preterm Birth As The Event And Gestational Age At Birth As The Time Scale. Model-1 Based On Pre-Pregnancy Factors. Model-2 Utilized Pre-Pregnancy Factors And Pregnancy Conditions. The Variables Retained In The Final Models Were Selected Using Backward Elimination. | AUC Harrell C-And D-Statistic                     | Splitting    | Yes | P-Value => 0.05                                      | 0.45(NR, NR)    | No  | Not reported      | Not reported       | Yes          | Multiple Imputation | Backward Elimination | Kept Linear  | Prediction Rule    |
| Hebbar and samjha na 2006 (24) | The Model Was Developed At Cut Off Value Of 25mm For The Cervical Length Measurements                                                                                                                                                                                                              | AUC, Sensitivity, Specificity NPV And PPV         | Not reported | No  | Not reported                                         | Not reported    | Yes | 77%               | 95%                | Not reported | N/A                 | Not reported         | Not reported | Not reported       |
| Hebert et al., 2022 (25)       | The Data Were Randomly Split Into Developmental And Validation Datasets. The Pre-Pregnancy Model Could Be Evaluated Prior To Pregnancy. The End Of First Trimester Model Evaluated By The End Of The First Trimester (13weeks). The Mid Pregnancy Model Evaluated By 20 Weeks Of Gestation.        | Calibration (Hosmer-Lemeshow Goodness Of Fit) AUC | Not reported | No  | Development P-Value = 0.33 Validation P-Value = 0.27 | 0.66(NR, NR)    | No  | N/A               | N/A                | Not reported | N/A                 | Not reported         | Kept Linear  | Point Of Care Tool |
| Newman et al. (26)             | The Model Developed By Collecting Data From Pregnant Women And Use Discriminations And Sensitivity Analysis Was Done                                                                                                                                                                               | AUC                                               | Not reported | No  | Not reported                                         | 0.68(0.62,0.75) | Yes | 13.4% (8%, 20.6%) | 97.7% (97%, 98.2%) | Not reported | N/A                 | Not reported         | Not reported | ROC Curve          |

|                                       |                                                                                                                                                                                                                                                    |                                 |                  |              |              |                      |     |              |              |              |     |                                                                                 |             |                                            |
|---------------------------------------|----------------------------------------------------------------------------------------------------------------------------------------------------------------------------------------------------------------------------------------------------|---------------------------------|------------------|--------------|--------------|----------------------|-----|--------------|--------------|--------------|-----|---------------------------------------------------------------------------------|-------------|--------------------------------------------|
| Hellemans et al., 1995 (27)           | As a Predictor For Preterm Delivery, Cervical Fetal Fibronectin Detection Were Used                                                                                                                                                                | Sensitivity Specificity PPV NPV | Not reported     | No           | Not reported | Not reported         | Yes | 60%          | 85%          | Not reported | N/A | Not reported                                                                    | Categorized | Not reported                               |
| Fergus et al., 2013 (28)              | The Model Was Developed By Machine Learning Data And Evaluated By ROC Curve, Sensitivity, And Specificity                                                                                                                                          | AUC Sensitivity Specificity     | Cross-Validation | No           | Not reported | 0.95(NR,NR)          | Yes | 96%          | 90%          | Not reported | N/A | ROC Curve                                                                       | N/A         | AUC Sensitivity Specificity                |
| Jelliffe-Pawlo wski et al., 2018 (29) | The Model Was By Dividing Data In Development And Testing Data Set. When Considered In Combination Using The Linear Discriminate For PTB With No Or Presence Of Preeclampsia, Biomarkers Maternal Age >34 Years And Low-Income Status Were Include | AUC                             | Not reported     | No           | Not reported | 0.750 (0.676,0.825). | No  | Not reported | Not reported | Not reported | N/A | Stepwise Backward Selection                                                     | Categorized | Algorithm                                  |
| Goyal et al., 2015a (4)               | Not reported                                                                                                                                                                                                                                       | AUC                             | Splitting        | No           | No           | 0.63(NR,NR)          | Yes | 29%          | 80%          | Not reported | N/A | Stepwise Selection (Forward Selection Followed By Series Of Backward Selection) | Categorized | Risk Score Chart                           |
| Jung et al., 2021 (30)                | Baseline Maternal And Obstetric Parameters And Outcomes Were Compared Between Delivery <32 Weeks And Delivery > 32 Weeks. Multivariate Logistic Regression Analyses Were Used And AUC Were Calculated                                              | AUC Sensitivity Specificity     | Bootstrapping    | Not reported | Not reported | 0.86(0.71,1.00)      | Yes | 80%          | 70%          | Not reported | N/A | Not reported                                                                    | Kept Linear | Model Formula With Regression Coefficients |

|                            |                                                                                                                                              |                                            |               |              |              |                 |     |                                    |                                        |              |                                            |                                                                                 |              |                         |
|----------------------------|----------------------------------------------------------------------------------------------------------------------------------------------|--------------------------------------------|---------------|--------------|--------------|-----------------|-----|------------------------------------|----------------------------------------|--------------|--------------------------------------------|---------------------------------------------------------------------------------|--------------|-------------------------|
| Goyal et,al, 2015b (5)     | Use Stepwise Elimination Of Variable To Develop Model                                                                                        | AUC                                        | Splitting     | No           | Not reported | 0.63(NR,NR)     | Yes | 29%                                | 82%                                    | Yes          | Complete Case Analysis Multiple Imputation | Stepwise Selection (Forward Selection Followed By Series Of Backward Selection) | Categorized  | Risk Score              |
| Nikolova , et al.2018 (31) | The Model Develop By Adding Incremental Value Of Biomarkers                                                                                  | Sensitivity Analysis                       | Not reported  | No           | Not reported | Not Reported    | Yes | 53.9%(37.2%,69.9%)                 | 97.4%(95.1%,98.8%)                     | Not Sated    | N/A                                        | Not reported                                                                    | Kept Linear  | Regression Coefficients |
| Alleman,et al 2013 (32)    | The Model Develop Using Maternal Characteristics And Biomarkers                                                                              | Sensitivity, Specificity, PPV, NPV And AUC | Bootstrapping | No           | No Stated    | 0.69(NR, NR)    | Yes | 17.5%                              | 97.0%                                  | Not Sated    | N/A                                        | Stepwise Selection (Forward Selection Followed By Series Of Backward Selection) | Not reported | Regression Coefficients |
| Anderson, et al 1990 (33)  | The Model Develops By Examination Of Ultrasonography For Cervical Length Measurement                                                         | Sensitivity Specificity                    | Not reported  | Not reported | Not reported | Not Reported    | Yes | ABDCX = 46%, VAGCX= 76% MANCX= 71% | ABDCX = 53%, VAGCX= 59% And MANCX= 58% | Not reported | N/A                                        | Logistic Regression                                                             | Not reported | Not reported            |
| Grobman et,al, 2016 (34)   | The Model Developed By Measuring Cervical Length                                                                                             | AUC                                        | Not reported  | Not reported | Not reported | 0.63(0.58,0.63) | No  | Not reported                       | Not reported                           | Yes          | Complete Case Analysis                     | Not reported                                                                    | Kept Linear  | Prediction Rule         |
| Park et al., 2021 (35)     | The Bacteria Were Collected From Cervico-Vaginal Fluid After Preterm Birth And Developing Bacterial Risk Score To Predict Preterm-Birth Then | AUC Sensitivity Specificity                | Not reported  | Not reported | Not reported | 0.723(NR, NR)   | Yes | 71%                                | 59%                                    | Not reported | N/A                                        | Not reported                                                                    | Kept Linear  | Prediction Rule         |
| Pasquini et al.,2014 (36)  | Trans-Vaginal Sonographic Assessment Of The CL In Second Trimester Ultrasound Test.                                                          | AUC Sensitivity, Specificity PPV NPV LLR   | Not reported  | Not reported | Not reported | 0.657(NR, NR)   | Yes | 73.9%                              | 45.7%                                  | Not reported | N/A                                        | Not reported                                                                    | Kept Linear  | Prediction Rule         |



|                                  |                                                                                                                                  |                             |              |              |              |                 |     |                                                                                     |                                                                                         |     |                        |                                                                                 |              |                         |
|----------------------------------|----------------------------------------------------------------------------------------------------------------------------------|-----------------------------|--------------|--------------|--------------|-----------------|-----|-------------------------------------------------------------------------------------|-----------------------------------------------------------------------------------------|-----|------------------------|---------------------------------------------------------------------------------|--------------|-------------------------|
| Posthumus et al., 2016 (37)      | The Model Was Developed From Maternal Medical And Non-Medical Risk Factors                                                       | Calibration Plot            | Not reported | Not reported | Not reported | Not Reported    | No  | Not reported                                                                        | Not reported                                                                            | Yes | Multiple Imputation    | Stepwise Selection (Forward Selection Followed By Series Of Backward Selection) | Not reported | Risk Score Card         |
| Dziadosz et al., 2016 (38)       | Model Develops Using Linear Regression Model.                                                                                    | Sensitivity Specificity     | Not reported | Not reported | Not reported | 0.78(0.71,0.81) | Yes | 80% (71%,88%                                                                        | 53% (52%,54%)                                                                           | Yes | Complete Case Analysis | Stepwise Selection (Forward Selection Followed By Series Of Backward Selection) | Kept Linear  | Regression Coefficient  |
| Prema and pushpalatha ,2019 (39) | The Model Was Developed By Using Logistic Regression, SVM And Class Imbalance Problem By Using Data Mining Techniques            | AUC Sensitivity Specificity | Not reported | Not reported | Not reported | Not reported    | Yes | 70.37% For Logistic 83.87% =For SVM With Linear Kernel 70.4%=SVM With Radial Kernel | 79.79%= For Logistic, 72.58 %=For SVM With Linear Kernel ,0.7551=SVM With Radial Kernel | No  | N/A                    | Not reported                                                                    | Categorized  | Prediction Rule         |
| Garcia – blanco et.al, 2017(40)  | The Model Was Developed By Nomogram                                                                                              | AUC                         | Not reported | No           | Not reported | 0.63(NR, NR)    | No  | Not reported                                                                        | No Stated                                                                               | Yes | Regression Imputation  | Not reported                                                                    | Kept Linear  | Nomogram                |
| Raba and Kotarski ., 2016 (41)   | By Using All Variable Selection Methods Forward, Back Ward And Step Wise Variables Was Selected And 5 Variables Were Significant | AUC Sensitivity Specificity | Not reported | Not reported | Not reported | 0.79(0.75,0.82) | Yes | Not reported                                                                        | 99.5%                                                                                   | Yes | N/A                    | Stepwise Selection (Forward Selection Followed By Series Of Backward Selection) | Categorized  | Algorithm               |
| Rafael et al. , 2012 (42)        | The Model Was Developed From Previous Twin Preterm Birth Vs Term Birth To Predict Singleton Preterm Birth                        | AUC                         | Not reported | Not reported | Not reported | 0.77(NR,NR)     | Yes | 77.8%                                                                               | 73.4%                                                                                   | No  | N/A                    | Not reported                                                                    | Kept Linear  | Regression Coefficients |
| Crane et.al,                     | The Model Develops From Biomarkers For                                                                                           | Sensitivity Specificity     | Not reported | No           | Not reported | Not Reported    | Yes | 77.8 % (43.1%,96.1                                                                  | 80.2% (72.7%,86.3 %)                                                                    | Yes | Complete               | Not reported                                                                    | Kept Linear  | Model Formula           |

|                              |                                                                                                                                                                                                                                                                    |                              |                    |                 |               |                                                        |     |                                                                                                                                                                                 |                                                                                                                                                                        |    |               |                                                       |               |                              |
|------------------------------|--------------------------------------------------------------------------------------------------------------------------------------------------------------------------------------------------------------------------------------------------------------------|------------------------------|--------------------|-----------------|---------------|--------------------------------------------------------|-----|---------------------------------------------------------------------------------------------------------------------------------------------------------------------------------|------------------------------------------------------------------------------------------------------------------------------------------------------------------------|----|---------------|-------------------------------------------------------|---------------|------------------------------|
| 1999<br>(43)                 | Impacts To Preterm Birth                                                                                                                                                                                                                                           |                              | rted               | ted             | d             |                                                        |     | %)                                                                                                                                                                              |                                                                                                                                                                        |    | Case Analysis |                                                       | r             | With Regression Coefficients |
| Baer et al 2018<br>(44)      | The Original Sample Is Divided Into Two As Training And Testing (2/3 And 1/3), Where The Testing Is To Make Validation                                                                                                                                             | AUC                          | Splintin g         | No t rep ort ed | Not reporte d | 0.591(0.589, 0.594)                                    | No  | Not reported                                                                                                                                                                    | Not reported                                                                                                                                                           | No | Not report ed | Stepwise Backward Selection                           | Kept Linea r  | Risk Score Chart             |
| Riboni et al. ,2011<br>(45)  | The Model Was Developed For Women Below 34 Weeks Of Gestation, Below 37 Weeks Of Gestation And Within 7 Days Delivery                                                                                                                                              | Sensitivity Specificity      | Not repo rted      | No t rep ort ed | Not reporte d | Not reported                                           | Yes | Phigfbp-1 Test <37 Weeks = 52.9 % Ffn Test =50%                                                                                                                                 | Phigfbp-1 Test <37 Weeks =89.2 % Ffn Test =81.9%                                                                                                                       | No | N/A           | Stepwise Forward Selection                            | Kept Linea r  | Regression Coefficients      |
| Banos et al, 2018<br>(46)    | Model Was Evaluated by AUC, Sensitivity and Specificity                                                                                                                                                                                                            | AUC Sensitivity Specificity  | Not repo rted      | No              | Not reporte d | For CCI = 0.84(0.75, 0.93)<br>For CL = 0.68(0.56,0.81) | Yes | For CCI = 77.3%,<br>CL = 72.7 %                                                                                                                                                 | For CCI = 82.7%,<br>CL = 61.2%                                                                                                                                         | No | N/A           | Multivariable Logistic Regression                     | Not report ed | Regression Coefficient       |
| Riboni et al. ,2012<br>(47)  | The Model Was Developed Based On 491 Pregnant Women By The Above 4 Predictors                                                                                                                                                                                      | AUC Sensitivity Specificity  | Not repo rted      | No t rep ort ed | Not reporte d | Not reported                                           | Yes | Phigfbp-1=54.1<br>IL-6=22.9%<br>CRP=33.3%<br>Phigfbp-1 + IL-6 + CR=17.9%                                                                                                        | Phigfbp-1=72.1%<br>IL-6=94.2 %<br>CRP=86.1 %<br>Phigfbp-1 + IL-6 + CR=99.5%                                                                                            | No | N/A           | Stepwise Forward Selection                            | Categ orized  | Regression Coefficients      |
| Kim et al., 2011<br>(48)     | The Diagnostic And Prognostic Accuracy Of Each Marker Was Evaluated, And The Optimal Cut-Off Values Of Each Were Selected. Survival Analysis Was Performed To Assess The Relationship Between The Time From Admission To Delivery And The Result Of Each Marker. . | AUC Sensitivity Specificity  | Not repo rted      | No t rep ort ed | Not reporte d | 0.822(0.748,0.895)                                     | Yes | For Neutrophil 40.2%,<br>Lymphocytes 39.2%,<br>Basophils 49%<br>Monocyte 31.4%<br>Eosinophil 19.6%,<br>CRP 58.8%<br>NLR 52% ,<br>Cervix Length 61.2%,<br>Combine d Marker 64.2% | Neutrophil 0.89%<br>Lymphocyte 84.9%<br>Basophil 68.5%<br>Monocyte 82.2%<br>Eosinophil19.6%<br>CRP 69.9%<br>NLR 78.1%<br>Cervix Length 80.0%<br>Combined Marker 88.3%. | No | N/A           | Not reported                                          | Kept Linea r  | Regression Coefficients      |
| Balardi , et al 2016<br>(49) | The Model Develops From Maternal Factors                                                                                                                                                                                                                           | AUC, Sensitivity Specificity | Cros s Vali dation | No t rep ort ed | Not reporte d | 0.65 (0.595, 0.986)                                    | Yes | 80.5%                                                                                                                                                                           | 70%                                                                                                                                                                    | No | N/A           | Multivariate And Univariate Statistical Data Analysis | Kept Linea r  | Not reported                 |

|                                |                                                                                                                                                                            |                                     |               |     |                                               |                                                                                       |     |                                                                                                                     |                                                                                                                      |     |                        |                                                                              |             |              |
|--------------------------------|----------------------------------------------------------------------------------------------------------------------------------------------------------------------------|-------------------------------------|---------------|-----|-----------------------------------------------|---------------------------------------------------------------------------------------|-----|---------------------------------------------------------------------------------------------------------------------|----------------------------------------------------------------------------------------------------------------------|-----|------------------------|------------------------------------------------------------------------------|-------------|--------------|
| Ridout et al., 2019 (50)       | The Model Was Developed From Assessing Cervical Length and Quantitative Fetal Fibronectin                                                                                  | AUC Sensitivity                     | Not reported  | No  | Not reported                                  | Cervical Length 0.59(0.55,0.64), -For Quantitative Fetal Fibronectin 0.58(0.49, 0.68) | Yes | For Cervical Length 20.3% And 15.2% For <34 And 37 Weeks Respectively                                               | Not reported                                                                                                         | No  | N/A                    | Not reported                                                                 | Kept Linear | Algorithm    |
| Gioan et.al, 2018 (51)         | The Model Develops From Maternal Characteristics By Adding Factors                                                                                                         | AUC, Sensitivity And Specificity    | Bootstrapping | No  | Not reported                                  | 0.77(0.72,0.81)                                                                       | Yes | 74% (63.2%,83.6%)                                                                                                   | 72.7% (67%,78%)                                                                                                      | Yes | Complete Case Analysis | Stepwise Selection (Forward Selection Followed By Series Backward Selection) | Kept Linear | Nomogram     |
| Koivu and sairane n, 2020 (52) | Using Determinants Logistic Regression (LR), Gradient Boosting Decision Tree (GBDT) And Two Artificial Neural Network (ANN) Models Were Used In This Study Were Developed. | AUC                                 | Not reported  | Yes | Not reported                                  | 0.64(0.64, 0.64).                                                                     | No  | Not reported                                                                                                        | Not reported                                                                                                         | No  | N/A                    | Stepwise Forward Selection                                                   | Kept Linear | Algorithm    |
| Barinov et al , 2021 (53)      | The Model Develops From Phosphorylated Insulin-Like Growth Factor Binding Protein-1 (Phigfb-1), Placental Alpha Macroglobulin-1(PAMG-1)                                    | AUC Sensitivity Specificity         | Not reported  | No  | Not reported                                  | Not reported                                                                          | Yes | Singleton Pregnancy: Phigfbp-1 = 55.6% And PAMG-1 = 97 AND Multiple Pregnancy: Phigfbp-1 = 33.3% And PAMG-1 = 33.3% | Singleton Pregnancy: Phigfbp-1 = 97% And PAMG-1 = 100 % AND Multiple Pregnancy: Phigfbp-1 = 93.3 %And PAMG-1 = 96.6% | No  | N/A                    | Not reported                                                                 | Kept Linear | Not reported |
| Kuhr et al, 2016 (54)          | Of The Predictors Considered, Only Quantitative Fibronectin And Previous PTB/PPROM The Best Parametric Survival Model Determined By Lowest AIC And BIC)                    | AUC Sensitivity Specificity PPV NPV | Splitting     | No  | P-Value 0.38 Training And For Validation 0.64 | 0.89(0.77,0.90)                                                                       | Yes | For Training 66.7 %( 44.7%, 84.4%) And For Validation 72 %( 50.6%, 87.9%)                                           | For Training 78.9 %( 71.9%, 84.9%) And For Validation 77.2 %( 70.1%, 80.4%)                                          | No  | N/A                    | Stepwise Forward Selection                                                   | Kept Linear | Not Sated    |
| Rohlfing et al.                | The Model Was Developed From                                                                                                                                               | AUC                                 | Not reported  | No  |                                               | 0.601 (NR,NR)                                                                         | No  | Not reported                                                                                                        | Not reported                                                                                                         | No  | N/A                    | Not reported                                                                 | Kept Linear | Regression   |

|                                   |                                                                                                                                                                                                 |                                   |                  |              |              |                                                                        |     |                                                                                  |                                                                                       |     |                     |                                                                              |              |                         |              |
|-----------------------------------|-------------------------------------------------------------------------------------------------------------------------------------------------------------------------------------------------|-----------------------------------|------------------|--------------|--------------|------------------------------------------------------------------------|-----|----------------------------------------------------------------------------------|---------------------------------------------------------------------------------------|-----|---------------------|------------------------------------------------------------------------------|--------------|-------------------------|--------------|
| ,2020<br>(55)                     | Maternal Cardiovascular Risk Factors(HTN, DM, Cholesterol, Smoking)                                                                                                                             |                                   | Not reported     | Not reported |              |                                                                        |     |                                                                                  |                                                                                       |     |                     |                                                                              |              |                         | Coefficients |
| Bartnicki et al, 1996<br>(10)     | The Model Develops By Fibronectin To Predict LBW                                                                                                                                                | Sensitivity Specificity           | Not reported     | Not reported | Not reported | Not reported                                                           | Yes | 67.5%                                                                            | 90.3 %                                                                                | No  | N/A                 | Stepwise Selection (Forward Selection Followed By Series Backward Selection) | Kept Linear  | Regression Coefficients |              |
| Bastek et al , 2012<br>(56)       | The Model Is Developed From Pregnant Women Who Are Already Presented With Preterm Labor If They Deliver Within 10 Days Of Their Presentation Or Before 37 Weeks Of Gestation (Both Are Preterm) | AUC, Sensitivity Specificity      | Bootstrapping    | No           | Not reported | 0.73(NR,NR)                                                            | Yes | For Delivery Within 10 Days=84% And For Delivery Before 37 Weeks = 79%           | For Delivery Within 10 Days= 51% And For Delivery Before 37 Weeks=50%                 | No  | N/A                 | Univariable Followed By Multivariable Logistic Regression                    | Categorized  | Regression Coefficients |              |
| Saade et al. , 2016<br>(57)       | N/A                                                                                                                                                                                             | AUC Sensitivity Specificity       | N/A              | Yes          | Not reported | 0.67 (0.52, 0.81)                                                      | Yes | 75%                                                                              | 74%                                                                                   | No  | N/A                 | Not reported                                                                 | Not reported | Regression Coefficients |              |
| Lee et al., 2011<br>(58)          | The Bayesian Filtering Algorithm Was Developed.                                                                                                                                                 | Sensitivity, Specificity PPV ,NPV | Not reported     | No           | No           | Not Reported                                                           | Yes | 68.80%                                                                           | 85%                                                                                   | No  | N/A                 | Stepwise Forward Selection                                                   | Kept Linear  | Algorithm               |              |
| Arabi Belaghi et al, 2021<br>(59) | The Model is A Machine Learning Based On Logistic Regression Which Utilized A Huge Sample Size By Splitting 2/3 To Model Development and The Remaining 1/3 To The Model Validation              | AUC Sensitivity, Specificity      | Cross-Validation | No           | Not reported | 0.65(0.63,0.66)                                                        | Yes | During 1st Trimester;62% (47.8%,52.4%)<br>During 2nd Trimester: 66%(60.0%,63.4%) | During 1st Trimester: 64.5% (63.1%,65.4%)<br>During 2nd Trimester: 87.0%(85.5%,88.4%) | Yes | Multiple Imputation | Stepwise Selection (Forward Selection Followed By Series Backward Selection) | Categorized  | Regression Coefficients |              |
| Schmitz et al. , 2008             | The Model Was Developed By Classifying Bishop                                                                                                                                                   | AUC Sensitivity Specificity       | Not reported     | Not reported | Not reported | bishop Score 0.848(NR, NR)<br>Sonographic Cervical Length 0.813(NR,NR) | Yes | For Bishop Score=97 % (84%, 100%)                                                | For Bishop Score; 96% (93%, 98%)                                                      | No  | N/A                 | Not Stated                                                                   | Categorized  | Algorithm               |              |

|                         |                                                                                                                                                                          |                                     |                  |              |              |                                                                   |     |                                                                      |                                                            |     |                        |                                                                              |             |                         |  |
|-------------------------|--------------------------------------------------------------------------------------------------------------------------------------------------------------------------|-------------------------------------|------------------|--------------|--------------|-------------------------------------------------------------------|-----|----------------------------------------------------------------------|------------------------------------------------------------|-----|------------------------|------------------------------------------------------------------------------|-------------|-------------------------|--|
| (60)                    | Score>4 And >8 Plus Preterm Delivery With In 48 Hours And With In 7 Days                                                                                                 |                                     |                  | ort ed       |              |                                                                   |     | For Cervical Length=95% (75%, 100%)                                  | For Cervical Length=29% (22%, 36%)                         |     |                        |                                                                              |             |                         |  |
| Lee et al., 2020 (61)   | Model Was Developed Using Logistic Regression And AUC Was Reported For The Nomogram Of Early Preterm And Late Preterm Prediction.                                        | AUC                                 | Not reported     | Not reported | Not reported | 0.717 (0.675,0.759)                                               | No  | Not reported                                                         | Not reported                                               | No  | N/A                    | Stepwise Selection (Forward Selection Followed By Series Backward Selection) | Kept Linear | Nomogram; Decision Tree |  |
| Menon et al 2014 (62)   | It Is A Machine Learning Based On Pregnant Women Recruited On A Case Control Study                                                                                       | AUC                                 | Cross Validation | Not reported | Not reported | In African Americans: 0.86(NR, NR)<br>In Caucasians: 0.68(NR, NR) | No  | Not reported                                                         | Not reported                                               | No  | N/A                    | Multivariate Adaptive Regression Splines                                     | Kept Linear | Regression Coefficients |  |
| Lee et al., 2015 (63)   | The Model Develops From Biomarkers                                                                                                                                       | AUC                                 | Cross Validation | Not reported | Not reported | 0.852 (0.766, 0.938)                                              | No  | Not reported                                                         | Not reported                                               | No  | N/A                    | Stepwise Forward Selection                                                   | Kept Linear | Not reported            |  |
| Leow et al., 2020 (64)  | Prospective Cohort Was Conducted And Seven Predictors Were Identified Then AUC And Sensitivity Specificity Analysis Was Done Finally Model Was Presented Using Algorithm | AUC Sensitivity, Specificity        | Splitting        | Not reported | Not reported | 0.88 (NR, NR)                                                     | Yes | For Development 100%(76%, 100%)And 91%(62%, 100%) For Validation Set | 74% (66%, 81%) development and 78% (70%,84%)For Validation | No  | N/A                    | Not reported                                                                 | Kept Linear | Algorithm               |  |
| Cohen et al 2014 (11)   | The Model Develops From Pregnancy Associated Proteins                                                                                                                    | AUC Sensitivity, Specificity        | Not reported     | Not reported | Not reported | 0.72 (NR,NR)                                                      | Yes | 63%                                                                  | 71%                                                        | Yes | Complete Case Analysis | Univariable And Multivariable Logistic Regression                            | Kept Linear | Regression Coefficients |  |
| Leung et al., 2005 (65) | Model Developed Using Cervical Length And Funneling Then Logistic Regression Was Conducted Model Performance Was Measured Using                                          | Sensitivity Specificity PPV NPV LR+ | Not reported     | Not reported | Not reported | 0.56 (0.51,0.62)                                                  | Yes | Less Than 27mm Cervical Length With Funneling =26.3 % ( 6.5%, 46.1%) | 99 % (98.6%, 99.4%)                                        | No  | N/A                    | Not reported                                                                 | Categorized | Not reported            |  |

|                                |                                                                                                                                                                                                                                                                                                                                                                |                                           |               |                        |                      |                                                                                        |     |                                                                |                                   |    |     |                            |             |                         |  |
|--------------------------------|----------------------------------------------------------------------------------------------------------------------------------------------------------------------------------------------------------------------------------------------------------------------------------------------------------------------------------------------------------------|-------------------------------------------|---------------|------------------------|----------------------|----------------------------------------------------------------------------------------|-----|----------------------------------------------------------------|-----------------------------------|----|-----|----------------------------|-------------|-------------------------|--|
|                                | Sensitivity Specificity Analysis.                                                                                                                                                                                                                                                                                                                              |                                           |               |                        |                      |                                                                                        |     |                                                                |                                   |    |     |                            |             |                         |  |
| Lin et al., 2021 (66)          | The National Vital Statistics System (NVSS) Was Queried For Singleton ART-Treated Pregnant Women From Multivariable Cox Regression Was Used To Develop The Early (< 32 Weeks) Or Late (< 37 Weeks) PTB Risk Model Using Both Statistical Significance. Cox-Proportional Model Was Used And The Bootstraps Using 1000 Repeats Were Used For Internal Validation | AUC Calibration Slope Brier Score         | Bootstrapping | Calibration Slope 0.99 | Not reported         | 0.684(NR,NR)                                                                           | No  | Not reported                                                   | Not reported                      | No | N/A | Stepwise Forward Selection | Categorized | Nomogram                |  |
| Liu et al., 2020 (67)          | Model Was Developed Using Original Beta Coefficients And Presented With Nomogram And Formula                                                                                                                                                                                                                                                                   | AUC Sensitivity Specificity               | Bootstrapping | Not reported           | P-Value 0.02         | 0.803(0.76,0.85)                                                                       | Yes | 65.80%                                                         | 84%                               | No | N/A | Not reported               | Categorized | Nomogram                |  |
| Van de Mheen et al., 2014 (68) | The Model Was Developed From The Previous RCT Trial For AMPHA Drug Trial For Predicting Preterm Birth                                                                                                                                                                                                                                                          | Calibration Plot, Sensitivity Specificity | Splitting     | Not reported           | Calibration was good | 0.68 (0.63 ,0.72)                                                                      | Yes | AT Cervical Length Cut Off Value>40 Mm=88.4%                   | At Cut Off Value Of CL > 40 =30.5 | No | N/A | Not reported               | Categorized | Regression Coefficients |  |
| Yazici et al., 2004 (69)       | The Model Was Developed By Comparing Trans Vaginal And Trans Peroneal Sonography To Predict Preterm Delivery By Examining At 24 Weeks Gestation                                                                                                                                                                                                                | AUC Sensitivity                           | Not reported  | Not reported           | Not reported         | For trans vaginal Sonography; 0.801(NR,NR)<br>Trans Perennial Sonography; 0.857(NR,NR) | Yes | Trans Vaginal Sonography=72%<br>Trans perennial Sonography=77% | Not reported                      | No | N/A | Not reported               | Kept Linear | Algorithm               |  |

|                                                         |                                                                                                                                                                                 |                                                                            |                             |                             |                                                                                        |                     |     |                                                                                                                                                            |                                                                                                                                 |     |                                |                                                                                                      |                    |                                                                |
|---------------------------------------------------------|---------------------------------------------------------------------------------------------------------------------------------------------------------------------------------|----------------------------------------------------------------------------|-----------------------------|-----------------------------|----------------------------------------------------------------------------------------|---------------------|-----|------------------------------------------------------------------------------------------------------------------------------------------------------------|---------------------------------------------------------------------------------------------------------------------------------|-----|--------------------------------|------------------------------------------------------------------------------------------------------|--------------------|----------------------------------------------------------------|
| Muelle<br>r-<br>Heubac<br>hGuzic<br>k.,<br>1989<br>(70) | This Study Was<br>Evaluation Of<br>Previously<br>Developed Scoring<br>System                                                                                                    | Sensitivity                                                                | N/A                         | Yes                         | Not<br>Sated                                                                           | Not reported        | Yes | 28.80%                                                                                                                                                     | Not reported                                                                                                                    | No  | N/A                            | Not reported                                                                                         | Categ<br>orized    | Model<br>Formula<br>With<br>Regressio<br>n<br>Coefficien<br>ts |
| Morten<br>sen et<br>al.,198<br>7<br>(71)                | Sensitivity,<br>Specificity And<br>Predictive Values<br>Reported Using Four<br>Comparison Groups                                                                                | Sensitivity,<br>Specificity<br>PPV NPV                                     | Not re<br>ported            | No                          | Not re<br>ported                                                                       | Not reported        | Yes | For Past<br>Medical<br>History=42% ;<br>For With<br>Complication<br>In Current<br>Pregnancy 71%<br>And For The<br>Group With<br>Cervical<br>Screening 0.33 | For Past Medical<br>History =82%<br>For With<br>Complication In<br>Current<br>Pregnancy70%<br>and For Cervical<br>Screening 88% | No  | N/A                            | Not reported                                                                                         | Categ<br>orized    | Not<br>reported                                                |
| Morke<br>n et al.,<br>2014<br>(72)                      | Model Was<br>Developed And<br>Validated Internally.<br>The AUC Of Each<br>Model Was<br>Reported. The Model<br>Developed Was<br>Through<br>Multivariable<br>Logistic Regression. | AUC                                                                        | Cros<br>s<br>Vali<br>dation | No<br>t<br>rep<br>ort<br>ed | Not re<br>ported                                                                       | 0.74 ( 0.73, 0.740) | No  | Not reported                                                                                                                                               | Not reported                                                                                                                    | No  | N/A                            | Stepwise<br>Forward<br>Selection                                                                     | Kept<br>Linea<br>r | Model<br>Formula<br>With<br>Regressio<br>n<br>Coefficien<br>ts |
| Zhang<br>et al .<br>,2021<br>(73)                       | The Model Was<br>Developed By<br>Comparing Of Two<br>Nomogram Between<br>22-24 And 26-28<br>Weeks Gestation To<br>Predict Preterm Birth                                         | Calibration<br>Plot , AUC<br>,Sensitivity<br>Decision<br>Curve<br>Analysis | Boot<br>strap<br>ping       | No<br>t<br>rep<br>ort<br>ed | C-<br>statistic<br>s<br>Nomog<br>ram1=0<br>.870<br>For<br>Nomog<br>ram-<br>2=0.90<br>8 | 0.881(NR,NR)        | Yes | For<br>Nomogram-1=<br>80 %And For<br>Nomogram-2<br>=69%                                                                                                    | For Nomogram-1<br>=75 % For<br>Nomogram-2<br>=88.6%                                                                             | No  | N/A                            | Stepwise<br>Selection<br>(Forward<br>Selection<br>Followed By<br>Series Of<br>Backward<br>Selection) | Keep<br>Linea<br>r | Nomogra<br>m                                                   |
| Macdo<br>nald –<br>wallis<br>et.al<br>2015<br>(74)      | The Model Develops<br>From Maternal<br>Factors                                                                                                                                  | AUC,<br>Calibration<br>Plot<br>Sensitivity<br>Specificity                  | Cros<br>s<br>Vali<br>dation | No<br>t<br>rep<br>ort<br>ed | Calibra<br>tion<br>Plot                                                                | 0.63(NR,NR)         | No  | 95%                                                                                                                                                        | 37 % ( 31%, 42%)                                                                                                                | Yes | Multi<br>ple<br>Imput<br>ation | Not reported                                                                                         | Categ<br>orized    | Score<br>Chart                                                 |
| Mailath                                                 | The Model Develops                                                                                                                                                              | Calibration                                                                | Not                         | Ye                          | (P                                                                                     | 0.80(0.70,0.81)     | No  | Not reported                                                                                                                                               | Not reported                                                                                                                    | Yes | Comp                           | Not reported                                                                                         | Kept               | Nomogra                                                        |

|                           |                                                                                                                                                                                               |                         |              |              |                  |                                                                                     |     |                     |                     |     |                        |                      |              |                         |
|---------------------------|-----------------------------------------------------------------------------------------------------------------------------------------------------------------------------------------------|-------------------------|--------------|--------------|------------------|-------------------------------------------------------------------------------------|-----|---------------------|---------------------|-----|------------------------|----------------------|--------------|-------------------------|
| -pokornyet,al,2015(75)    | From PROM, Cervical Length, CRP                                                                                                                                                               | Plot                    | reported     | s            | Value = 0.39)    |                                                                                     |     |                     |                     |     | lete Case Analysis     |                      | Linear       | m                       |
| McLean et,al,1999(76)     | The Model Develops From Concentrations Of Corticotrophin-Releasing Hormone. Î±-Fetoprotein                                                                                                    | AUC                     | Not reported | Not reported | Not reported     | 0.37(NR,NR)                                                                         | No  | Not reported        | Not reported        | Yes | Complete Case Analysis | Not reported         | Kept Linear  | Regression Coefficients |
| Watson et al.,2020(77)    | The Model Was Developed From Secondary Data Analysis From Previous Cohort By Using Cervical Length Fetal Fibroectin                                                                           | AUC Calibration Plot    | Not reported | Not reported | Calibration Plot | For Quantitative fibronectin Validated=0.90 (NR,NR) For Cervical Length 0.87(NR,NR) | No  | Not reported        | Not reported        | No  | N/A                    | Not reported         | Kept Linear  | Algorithm               |
| Mehta-Lee et,al,2017(78)  | The model develop from maternal factors                                                                                                                                                       | AUC                     | Not reported | Not reported | Not reported     | 0.647(NR,NR)                                                                        | No  | Not reported        | Not reported        | Yes | Complete case analysis | Not reported         | Kept linear  | Nomogram                |
| Mendoza et,al,2021(79)    | The model develops from by cervical pessary placement                                                                                                                                         | AUC                     | Not reported | Not reported | Not reported     | 0.88(0.76,1.00)                                                                     | Yes | 100%                | 80%                 | Yes | Complete case analysis | Not reported         | Not reported | Prediction rule         |
| Zhu et al.,2017(80)       | It was developed from maternal and fetal characteristics                                                                                                                                      | sensitivity Specificity | Not reported | Not reported | Not reported     | Not reported                                                                        | Yes | 82.6%               | 88.1%               | No  | N/A                    | Not reported         | Categorized  | Regression coefficients |
| Radhouane et al.,2017(81) | The model was developed by adding cervical length measurement at 12-14 weeks gestation compared to digital assessment of cervix by vaginal touch at first and second trimester of pregnancy's | sensitivity Specificity | Not reported | Not reported | Not reported     | Not reported                                                                        | Yes | 82.5%               | 78.7%               | No  | N/A                    | Not reported         | Kept linear  | Regression coefficients |
| Bachkangi et              | The model is developed to                                                                                                                                                                     | AUC, sensitivity        | Not reported | Not reported | Not reported     | AEA = 0.707(NR,NR) OEA = 0.628(NR,NR)                                               | Yes | AEA = 67% OEA = 44% | AEA = 67% OEA = 62% | no  | N/A                    | univariable analysis | Kept linear  | Regression              |



|                           |                                                                                                                                                   |                                            |                       |                             |                         |                 |     |              |              |     |                                      |                                   |                                    |                                |                  |
|---------------------------|---------------------------------------------------------------------------------------------------------------------------------------------------|--------------------------------------------|-----------------------|-----------------------------|-------------------------|-----------------|-----|--------------|--------------|-----|--------------------------------------|-----------------------------------|------------------------------------|--------------------------------|------------------|
| al,2019 (82)              | determine if plasma concentrations of some biomarkers increase among women who are at higher risk of preterm birth                                | specificity                                | rted                  | rep<br>ort<br>ed            | d                       |                 |     |              |              |     |                                      |                                   | followed by multivariable analysis |                                | coefficient<br>s |
| Szymusik et al.,2011 (83) | The model was developed by identifying spontaneous singleton pregnancies and Invitro fertilization singleton pregnancies to predict preterm birth | sensitivity<br>Specificity                 | Not reported          | No<br>t<br>rep<br>ort<br>ed | Not reported            | Not Reported    | Yes | 75%          | 91.7%        | No  | N/A                                  | Not reported                      | Categorized                        | Regression<br>coefficient<br>s |                  |
| Schaaf et al.,2012 (84)   | The model was developed using nationwide perinatal registry data to predict preterm birth                                                         | AUC,<br>sensitivity<br>calibration<br>plot | Boot<br>strap<br>ping | No<br>t<br>rep<br>ort<br>ed | Calibra<br>tion<br>plot | 0.63(0.63 0.63) | Yes | 42%(42%,42%) | 93%(93%,93%) | yes | Comp<br>lete<br>case<br>analys<br>is | Stepwise<br>backward<br>selection | Categorized                        | Regression<br>coefficient<br>s |                  |

**Table S4: Study characteristics prediction models for still birth**

| Study                      | Country | Study Design         | Center         | Study Population                                                             | Outcome     | Sample Size     |                | Outcome(N) | Incidence | Events Variable Per | Number Of Predictors                                                                                                                    | Model Type        | Model Analysis      |
|----------------------------|---------|----------------------|----------------|------------------------------------------------------------------------------|-------------|-----------------|----------------|------------|-----------|---------------------|-----------------------------------------------------------------------------------------------------------------------------------------|-------------------|---------------------|
|                            |         |                      |                |                                                                              |             | Develop<br>ment | Validat<br>ion |            |           |                     |                                                                                                                                         |                   |                     |
| Akolekar et al, 2016b (85) | UK      | Prospective Cohort   | Multi-Centered | Pregnant Women Attending For Routine Pregnancy Care At 11-13 Weeks Gestation | Still Birth | 45452           | Not reported   | 227        | 0.49%     | Not reported        | -Placental Growth Factor (PLGF), Fetal Ductus Venosus Pulsatility Index For Veins (DV-PIV)<br>-Uterine Artery Pulsatility Index (UT-PI) | Incremental Value | Logistic Regression |
| Goyal et.al, 2015b (5)     | USA     | Retrospective Cohort | Multi Centered | All Pregnant Women                                                           | Stillbirth  | 263             | 146            | 1          | 0.4%      | 0.14                | Multiparous, Race, Rape, Other Medical Conditions, Primi-Parous, Prenatal Care Entry, Prior Preterm Birth                               | Derivation        | Logistic Regression |
| Akolekar                   | UK      | Prospective          | Multi          | Women                                                                        | Stillbirth  | 70,003          | Not            | 268        | 0.38%     | Not reported        | Maternal Factor, HC,                                                                                                                    | Incremental       | Logistic            |

|                                            |           |                                    |                     |                                                                                                                                            |             |         |                     |              |              |              |                                                                                                                                                                                                                                                                                                                                                                                                                                                                                          |                          |                            |
|--------------------------------------------|-----------|------------------------------------|---------------------|--------------------------------------------------------------------------------------------------------------------------------------------|-------------|---------|---------------------|--------------|--------------|--------------|------------------------------------------------------------------------------------------------------------------------------------------------------------------------------------------------------------------------------------------------------------------------------------------------------------------------------------------------------------------------------------------------------------------------------------------------------------------------------------------|--------------------------|----------------------------|
| r, 2016a<br>(86)                           |           | e<br>Screening                     | Centered            | Attending ANC<br>At 19-24<br>Weeks<br>Gestation                                                                                            |             |         | reporte<br>d        |              |              |              | AC,FL Uterine Artery<br>Pulsatility Index (UT-PI)                                                                                                                                                                                                                                                                                                                                                                                                                                        | ental<br>Value           | Regressi<br>on             |
| Amark<br>et al,<br>2018<br>(87)            | Sweden    | Register-<br>Based<br>Cohort S     | Not<br>reported     | Pregnant<br>Women With<br>Overweight Or<br>Obesity                                                                                         | Still Birth | 45,859  | Not<br>reporte<br>d | 282          | 0.0062       | Not reported | BMI,, Pregnancy-Associated<br>Plasma Protein-A (PAPP-<br>A), maternal Age, Smoking ,<br>Country of birth and Parity                                                                                                                                                                                                                                                                                                                                                                      | Derivat<br>ion           | Logistic<br>Regressi<br>on |
| Aupont<br>et al,<br>2016<br>(88)           | UK        | Prospectiv<br>e<br>Screening       | Multi<br>Centered   | Women<br>Attending ANC<br>At 19-24<br>Weeks<br>Gestation                                                                                   | Still Birth | 70,003  | Not<br>reporte<br>d | 268          | 0.38%        | Not reported | Placental Growth Factor<br>Uterine Artery Pulsatility<br>Index ,HC,AC ,Maternal<br>Factors                                                                                                                                                                                                                                                                                                                                                                                               | Increm<br>ental<br>Value | Logistic<br>Regressi<br>on |
| Bahado-<br>singh et<br>al, 2019<br>(89)    | UK        | Prospectiv<br>e<br>Screening       | Single<br>Centered  | Pregnant<br>Women First<br>Trimester                                                                                                       | Still Birth | 180     | Not<br>reporte<br>d | 60           | 0.333        | Not reported | Glycine, Acetic Acid,<br>L-Carnitine, Creatine                                                                                                                                                                                                                                                                                                                                                                                                                                           | Derivat<br>ion           | Logistic<br>Regressi<br>on |
| Schneue<br>r et al. ,<br>2014<br>(9)       | Australia | Prospectiv<br>e<br>Cohort          | Single<br>Centered  | Pregnant<br>Women<br>Attending First<br>Trimester                                                                                          | Still birth | 4621    | Not<br>reporte<br>d | Not reported | Not reported | Not reported | Angiotensin 1,<br>Angiotensin 2,<br>Angiotensin 1/Angiotensin<br>2 Ratio, Maternal Age,<br>Socio-Economic Status<br>,Country of birth                                                                                                                                                                                                                                                                                                                                                    | Derivat<br>ion           | Logistic<br>Regressi<br>on |
| Koivu<br>and<br>Sairanen<br>, 2020<br>(52) | USA       | Cross<br>Sectional                 | Population<br>Based | Infant Birth<br>And Death Data<br>Sets Containing<br>Pregnancies<br>During The<br>Years CDC,<br>National Center<br>Of Health<br>Statistics | Stillbirth  | 266,419 | Not<br>reporte<br>d | 249          | 0.1%         | Not reported | Maternal age , Race, Marital<br>Status, Education , Number<br>of previous terminations,<br>Special Supplemental<br>Nutrition Program (WIC) ,<br>Smoking ,BMI, Height,<br>Weight , Parity, Pre-<br>Pregnancy Diabetes,<br>Gestational Diabetes, Pre-<br>Pregnancy Hypertension,<br>Gestational Hypertension,<br>Hypertension Eclampsia,<br>Prior Preterm Births,<br>Infertility, Assisted<br>Reproductive Technology<br>(ART), Previous Cesarean<br>Sections, other medical<br>condition. | Derivat<br>ion           | Logistic<br>Regressi<br>on |
| Mastrodi<br>ma et.al,<br>2016<br>(90)      | UK        | Prospectiv<br>e<br>Cohort<br>Study | Multi<br>Centered   | 1st Trimester<br>Pregnant                                                                                                                  | Still Birth | 76629   | Not<br>reporte<br>d | 268          | 0.35%        | 89.3         | PAPP-A, Uta-PI and DV-<br>PIV                                                                                                                                                                                                                                                                                                                                                                                                                                                            | Derivat<br>ion           | Logistic<br>Regressi<br>on |

**Table S4: Study characteristics prediction models for still birth (continued)**

| Study                      | Model Development                                                                                                      | Model Evaluation             | Internal Validation | External Validation | Calibration (P Value Hosmer-Lemeshow Test Or Calibration Plot) | Model Discrimination (AUC With 95% CI) | Model Performance | Sensitivity With 95%CI       | Specificity With 95%CI           | Handling Of Missing Value | Method Of Handling Missing Value           | Model Selection                                                                 | Handling Of Continuous Data | How Is The Model Presented |
|----------------------------|------------------------------------------------------------------------------------------------------------------------|------------------------------|---------------------|---------------------|----------------------------------------------------------------|----------------------------------------|-------------------|------------------------------|----------------------------------|---------------------------|--------------------------------------------|---------------------------------------------------------------------------------|-----------------------------|----------------------------|
| Akolekar et al, 2016b (85) | Not reported                                                                                                           | AUC                          | Not reported        | No                  | Not reported                                                   | 0.852(0.816,0.888)                     | No                | Not reported                 | Not reported                     | Not reported              | N/A                                        | Not reported                                                                    | Not reported                | Regression Coefficients    |
| Goyal et.al, 2015b (5)     | Use Stepwise Elimination Of Variable To Develop Model                                                                  | AUC                          | Splitting           | No                  | Not reported                                                   | 0.63(NR,NR)                            | Yes               | 29%                          | 82%                              | Yes                       | Complete Case Analysis Multiple Imputation | Stepwise Selection (Forward Selection Followed By Series Of Backward Selection) | Categorized                 | Risk Score                 |
| Akolekar, 2016a (86)       | The Model Develops Based On UT-PI And When Other Predictors Are Added (HC, AC, FL And Maternal Factors) In Combination | AUC                          | Not reported        | Not reported        | Not reported                                                   | 0.748(0.711, 0.785)                    | No                | Not reported                 | Not reported                     | No                        | Not reported                               | Univariate Logistic Regression                                                  | Not reported                | Regression Coefficients    |
| Amar k et al, 2018 (87)    | Model Was Develops From Maternal Characteristics And With AUROC Curve, Sensitivity And Specificity                     | AUC Sensitivity Specificity  | Cross Validation    | No                  | Not reported                                                   | 0.69(0.64,0.74)                        | Yes               | 28%                          | 90%                              | Yes                       | Complete Case Analysis                     | Univariable Logistic Regression Followed By Multivariable Logistic Regression   | Not reported                | Regression Coefficients    |
| Aupont et al, 2016 (88)    | This Model Is Intended To Test The Incremental Value Of Placental Growth Factor (PLGF) On Prediction Of Stillbirth     | AUC                          | Not reported        | No                  | Not reported                                                   | 0.950(0.932,0.967)                     | No                | Not reported                 | Not reported                     | No                        | N/A                                        | Not reported                                                                    | Not Stead                   | Regression Coefficients    |
| Bahad o-singh et al,       | The Model Is Developed To Identify Metabolites Which Predict                                                           | AUC, Sensitivity Specificity | Not reported        | No                  | Not reported                                                   | 0.860(0.793,0.927)                     | Yes               | For Metabolites = 66.7% When | For Metabolites = 62.5%, SP When | No                        | N/A                                        | Univariable Followed By Multivariable Logistic                                  | Not reported                | Regression Coefficients    |

|                                   |                                                                                                                                                                                   |                             |              |              |              |                                                                       |     |                                                                                                                                                 |                                                                                                                                               |     |                        |                            |              |                         |
|-----------------------------------|-----------------------------------------------------------------------------------------------------------------------------------------------------------------------------------|-----------------------------|--------------|--------------|--------------|-----------------------------------------------------------------------|-----|-------------------------------------------------------------------------------------------------------------------------------------------------|-----------------------------------------------------------------------------------------------------------------------------------------------|-----|------------------------|----------------------------|--------------|-------------------------|
| 2019<br>(89)                      | Stillbirth                                                                                                                                                                        |                             |              |              |              |                                                                       |     | Combined With Clinical Predictors = 68.3%<br>For Liquid Chromatography Coupled With Mass Spectrometry Combined With Clinical Predictors = 81.8% | Combined With Clinical Predictors = 68.3%, For Liquid Chromatography Coupled With Mass Spectrometry Combined With Clinical Predictors = 75.8% |     |                        | Regression                 |              |                         |
| Schneuer et al., 2014<br>(9)      | The Model Was Developed From Maternal Characteristics Like Age, Weight, Country Of Birth, Socio Economic Status With The Above Predictors                                         | AUC Sensitivity Specificity | Not reported | Not reported | Not reported | Ang-1/Ang-2 Ratio ; 0.70 (NR,NR)<br>Maternal Risk Factors 0.58(NR,NR) | Yes | <10%                                                                                                                                            | Not reported                                                                                                                                  | Yes | Multiple Imputation    | Not reported               | Not reported | Algorithm               |
| Koivu and Sairanen., 2020<br>(52) | Using Determinants Models Logistic Regression (LR), Gradient Boosting Decision Tree (GBDT) And Two Artificial Neural Network (ANN) Models Were Used In This Study Were Developed. | AUC                         | Not reported | Yes          | Not reported | 0.61(0.56, 0.66                                                       | No  | Not reported                                                                                                                                    | Not reported                                                                                                                                  | No  | N/A                    | Stepwise Forward Selection | Kept Linear  | Algorithm               |
| Mastrodima et.al, 2016<br>(90)    | The Develops From PAPP-A, UTA-PI And DV-PIV                                                                                                                                       | AUC                         | Not reported | Not reported | Not reported | 0.657(0.621, 0.693)                                                   | No  | Not reported                                                                                                                                    | Not reported                                                                                                                                  | Yes | Complete Case Analysis | Not reported               | Categorized  | Regression Coefficients |

**Table S5: Study characteristics prediction models for small for gestational age**

| Study                              | Country     | Study Design                    | Center           | Study Population                                         | Outcome | Sample Size |              | Outcome(N) | Incidence | Events Per Variable | Number Of Predictors                                                                                                                                           | Model Type        | Model Analysis       |
|------------------------------------|-------------|---------------------------------|------------------|----------------------------------------------------------|---------|-------------|--------------|------------|-----------|---------------------|----------------------------------------------------------------------------------------------------------------------------------------------------------------|-------------------|----------------------|
|                                    |             |                                 |                  |                                                          |         | Development | Validation   |            |           |                     |                                                                                                                                                                |                   |                      |
| Kim et al., 2019 (91)              | Korea       | Retrospective Follow Up         | Single Centered  | Pregnant Women                                           | SGA     | 442         | Not reported | 114        | 25.79%    | 22.8                | BPD, HC, AC, FL ,EFW                                                                                                                                           | Derivation        | A Linear Mixed Model |
| Antunes et al.,2021 (92)           | Brazil      | Retrospective Cohort            | Single Centered  | Pregnant Women Between 11 And 14 Weeks Of Gestation      | SGA     | 615         | Not reported | 44         | 7.1%      | Not reported        | -Family History of SGA, Pregnancy-Associated Plasma Protein, Placental Growth Factor, Uterine Artery Mean Pulsatility Index, Mean Arterial Pressure            | Derivation        | Logistic Regression  |
| Poon et al., 2015 (93)             | London      | Prospective Observational       | Multi Centered   | Second Trimester Of Pregnancy                            | SGA     | 7816        | Not reported | 389        | 5%        | Not reported        | BMI, maternal Age, Parity, Race , Mode of conception, Gestational age, Fetal Biometry, Birth Weight ,Uterine Artery Pulsatility Index, Placental Growth Factor | Incremental Value | Logistic Regression  |
| Posthumus et al., 2016 (37)        | Netherlands | Prospective Cohort              | Multi Centered   | All Pregnant Women                                       | SGA     | 836         | Not reported | 101        | 12%       | Not reported        | Previous history of ABO, Smoking, Alcohol Drinking, Drug Abuse , Social Support, Family Income, Housing Condition                                              | Derivation        | Logistic Regression  |
| Baekgaard Thorson et al.,2020 (94) | Denmark     | Prospective Cohort              | Population Based | Pregnant Women                                           | SGA     | 1937        | Not reported | 44         | 2.3%      | Not reported        | Placental Growth Factor                                                                                                                                        | Derivation        | Logistic Regression  |
| Kato et al., 2021 (95)             | Brazil      | A Cross-Sectional Retrospective | Population Based | Singleton Pregnancy                                      | SGA     | 231         | Not reported | 42         | 18.25     | 42                  | Ultrasonography                                                                                                                                                | Derivation        | Not reported         |
| Quant et al.,2016 (96)             | USA         | Prospective Cohort              | Single Centered  | Women With Singleton Gestations 11 And 14 Week Gestation | SGA     | 373         | Not reported | 36         | 9.7%      | Not reported        | Placental Volume, Placental Quotient, Mean Placental Diameter, Mean Chorionic Diameter,                                                                        | Derivation        | Logistic Regression  |

|                              |           |                           |                 |                                                                                  |     |      |              |              |              |              |                                                                                                                                                                                                                     |            |                     |
|------------------------------|-----------|---------------------------|-----------------|----------------------------------------------------------------------------------|-----|------|--------------|--------------|--------------|--------------|---------------------------------------------------------------------------------------------------------------------------------------------------------------------------------------------------------------------|------------|---------------------|
| Quinton et al., 2015 (97)    | Australia | Prospective Observational | Single Centered | Pregnant Women At 28-32 Weeks Of Gestation With Singleton Pregnancies            | SGA | 41   | Not reported | 8            | 20%          | Not reported | -HC/AC Ratio<br>HC/FL Ratio<br>HC,AC,FL ,BPD,<br>Umbilical Artery Doppler<br>Pulsatility Index, Four<br>Quadrant Amniotic Fluid<br>Index, EFW                                                                       | Derivation | Logistic Regression |
| Leavitt et al., 2021 (98)    | USA       | Prospective Cohort        | Multi Centered  | Women Referred For Fetal Growth Ultrasounds Between 26 And 36 Weeks Of Gestation | SGA | 199  | Not reported | 94           | 47.20%       | 47           | Cerebro-Placental Ratio and Umbilical Artery (UA) Doppler                                                                                                                                                           | Derivation | Logistic Regression |
| Schneuer et al., 2014 (9)    | Australia | Prospective Cohort        | Single Centered | Pregnant Women Attending First Trimester                                         | SGA | 4621 | Not reported | Not reported | Not reported | Not reported | Angiopoietin 1 -<br>Angiopoietin 2 -<br>Angiopoietin 1/Angiopoietin 2<br>Ratio, maternal Age,<br>Socio-Economic Status<br>Country of birth                                                                          | Derivation | Logistic Regression |
| Schwartz et al., 2014 (99)   | USA       | Prospective Cohort        | Single Centered | Women Carrying Singleton Pregnancies Who Presented At 11-14 Weeks Gestation      | SGA | 578  | 578          | 56           | 9.7%         | Not reported | Placental Volume (PV),<br>Placental Quotient [PQ]<br>Gestational Age,<br>Mean Placental Diameter<br>Chorionic Diameters,<br>Placental Morphology Index<br>Placental Growth Factor<br>and Placental Protein-13       | Derivation | Logistic Regression |
| Schwartz et al., 2012 (100)  | USA       | Retrospective Cohort      | Single Centered | Singleton Pregnancy Between 18 And 24 Weeks Gestation                            | SGA | 1909 | Not reported | Not reported | Not reported | Not reported | Maximal Placental Diameter, Mean Placental Diameter<br>Maximal Placental Thickness, AC ,<br>BPD , BPD; EFW Lag,<br>Estimated Fetal Weight; ,<br>Femoral length                                                      | Derivation | Logistic Regression |
| Lesmes et al., 2015(b) (101) | UK        | Prospective Follow Up     | Single Centered | Women With Second Trimester Of Pregnancy At 19+0 To 24+6 Weeks Gestation         | SGA | 9715 | Not reported | 481          | 5%           | 96.2         | Serum Pregnancy Associated Plasma Protein-A,<br>Human Chorionic Gonadotropin With Or<br>Without Fetoprotein (AFP),<br>Serum Placental Growth Factor (PIGF) and Serum<br>Soluble FMS-Like Tyrosine Kinase-1 (Sflt-1) | Derivation | Logistic Regression |
| Seravalli et al., 2014 (102) | USA       | Prospective Follow Up     | Multi Centered  | Second Trimester Pregnant                                                        | SGA | 1982 | Not reported | 172          | 8.6%         | Not reported | AC,HC,EFW<br>Uterine Artery, Umbilical<br>Artery Pulsatility Index;                                                                                                                                                 | Derivation | Logistic Regression |

|                              |           |                                  |                 |                                                                                             |     |         |              |                                                                              |              |              |                                                                                                                                                                                                                        |                   |                     |
|------------------------------|-----------|----------------------------------|-----------------|---------------------------------------------------------------------------------------------|-----|---------|--------------|------------------------------------------------------------------------------|--------------|--------------|------------------------------------------------------------------------------------------------------------------------------------------------------------------------------------------------------------------------|-------------------|---------------------|
| Lesmes et al., 2015(a) (103) | UK        | Prospective Follow Up            | Single Centered | Women Attending For Their Routine Hospital Visit In The Second Trimester Of Pregnancy       | SGA | 88,187  | Not reported | 5003 (598 And 4,405 Delivering At <37 And >37 Weeks Gestation Respectively ) | 5.70%        | Not reported | Maternal Height , Cigarette Smoking, Assisted Conception, Race, Parity, Inter-pregnancy interval, Previous PE, Previous SGA ,Previous Both SGA And PE, Chronic Hypertension, Diabetes Mellitus, SLE / APS, HC , AC, FL | Derivation        | Logistic Regression |
| Lesmes et al., 2015(C) (104) | UK        | Prospective Follow-Up            | Multi Center    | Women Attending Their Routine Hospital Visit In The Second Trimester Of Pregnancy           | SGA | 63 975  | 63975        | 3702                                                                         | 5.8%         | Not reported | Maternal Factors, Fetal Biometry ,UTA-PI and MAP                                                                                                                                                                       | Derivation        | Logistic Regression |
| Souka et al., 2012 (105)     | Greece    | An Observational Cross-Sectional | Single Centered | Third-Trimester Pregnancies Who Had Ultrasound Examination                                  | SGA | 2310    | Not reported | 121                                                                          | 5.20%        | Not reported | BPD, HC,AC ,Femur Length , Umbilical Artery (UA) Pulsatile Index(PI) and ,EFW                                                                                                                                          | Derivation        | Logistic Regression |
| Souka et al., 2013 (106)     | Greece    | Observational Cross-Sectional    | Multi Centered  | Pregnant Women With Ultrasound Scan Examination At 30-40 Weeks                              | SGA | 5978    | Not reported | 214                                                                          | 5.7%         | Not reported | Ultrasonography and Estimated Fetal Weight                                                                                                                                                                             | Incremental Value | Logistic Regression |
| MacDonald et al., 2018 (107) | Australia | Nested Case Control              | Single Centered | 102 Cases Of SGA Infants And A Matched Group Of 207 Controls; And 39 Cases Of Preeclampsia. | SGA | 348     | Not reported | 105                                                                          | 30.17%       | 35           | Placental Growth Factor ,Soluble FMS-Like Tyrosine Kinase 1,Placental Growth Factor to soluble FMS-Like Tyrosine Kinase 1 Ratio                                                                                        | Derivation        | Logistic Regression |
| Ye et al., 2020 (108)        | Japan     | Cross Sectional                  | Single Centered | Threatened Preterm Labour And Healthy Group Of Term Labor                                   | SGA | 95      | Not reported | 17                                                                           | 17.80%       | Not reported | Anti-Porphyrromonas Gingivalis Immunoglobulin G Subclass Antibody                                                                                                                                                      | Derivation        | Logistic Regression |
| McCowan et al., 2017 (109)   | Australia | Prospective Cohort               | Single Centered | 3rd Trimester Pregnant                                                                      | SGA | 3735    | 1871         | 633                                                                          | 11.2         | 301.5        | PAPP-A, Ng/MI, VEGFR1,                                                                                                                                                                                                 | Derivation        | Logistic Regression |
| Wen et                       | USA       | Retrospec                        | Multi           | Twin                                                                                        | SGA | 116 070 | 28911        | Not reported                                                                 | Not reported | Not reported | Maternal race, education,                                                                                                                                                                                              | Derivation        | Logistic            |

|                                   |         |                       |                 |                                     |     |      |              |    |    |              |                                                                                       |            |                     |
|-----------------------------------|---------|-----------------------|-----------------|-------------------------------------|-----|------|--------------|----|----|--------------|---------------------------------------------------------------------------------------|------------|---------------------|
| al. 2005 (110)                    |         | tive cohort           | centered        | pregnancy's women with her neonates |     |      |              |    |    |              | marital status, parity, prenatal care visit initiation, and cigarette smoking         |            | regression          |
| Rosendahl and Kivinen. 1991 (111) | Finland | Prospective follow up | Single centered | Singleton pregnancies               | SGA | 1112 | Not reported | 67 | 6% | Not reported | Smoking, pre-pregnancy weight, pregnancy associated hypertension, previous SGA infant | Derivation | Logistic regression |

**Table S5: Study characteristics prediction models for small for gestational age (Continued)**

| Study                     | Model Development                                                                                                                                | Model Evaluation                                 | Internal Validation | External Validation | Calibration (P Value Hosmer-Lemeshow Test Or Calibration Plot) | Model Discrimination (AUC With 95% CI)    | Model Performance | Sensitivity With 95% CI | Specificity With 95% CI            | Handling Of Missing Value | Method Of Handling Missing Value | Model Selection                                 | Handling Of Continuous Data | How Is The Model Presented |
|---------------------------|--------------------------------------------------------------------------------------------------------------------------------------------------|--------------------------------------------------|---------------------|---------------------|----------------------------------------------------------------|-------------------------------------------|-------------------|-------------------------|------------------------------------|---------------------------|----------------------------------|-------------------------------------------------|-----------------------------|----------------------------|
| Kim et al., 2019 (91)     | A Linear Mixed Model For Repeated Measures Was Used To Examine The Impact Fetal Biometric Parameters Over The Measurement Time. ROC Analysis Was | AUC Sensitivity Specificity PPV And NPV          | Not reported        | Not reported        | Not reported                                                   | EFW=0.826(0.778,0.872)<br>AC=0.806(NR,NR) | Yes               | EFW=60.6%<br>AC=79.5%   | EFW=87.6%<br>AC=71.7%              | Not reported              | N/A                              | Not reported                                    | Categorized                 | ROC Curve                  |
| Antunes et al., 2021 (92) | The Risk Of Small For Gestational Age Of Lower Than 5th And 10th Percentile Was Predicted Among First Trimester Pregnant Women                   | AUC Sensitivity, Specificity, PPV, NPV, LR+, LR- | Not reported        | Not reported        | Not reported                                                   | 0.676(0.585,0.766)                        | Yes               | SGA< 5th Percentile=30% | SGA< 5th Percentile For Both 90.1% | Not reported              | N/A                              | Univariate And Multivariate Logistic Regression | Not reported                | Regression Coefficients    |
| Poon et al., 2015 (93)    | The Model Was Developed From Multicenter Study And Adding Maternal Factors From The Previous Study Of Biophysical And                            | AUC                                              | Not reported        | No                  | Not reported                                                   | 0.874 (0.882,0.886)                       | No                | Not reported            | Not reported                       | Not reported              | N/A                              | Not reported                                    | Categorized                 | Prediction Rule            |



|                                     |                                                                                                                                    |                                           |              |              |              |                                                                  |     |                                                                                            |                                                                                                |     |                     |                                                                              |              |                         |
|-------------------------------------|------------------------------------------------------------------------------------------------------------------------------------|-------------------------------------------|--------------|--------------|--------------|------------------------------------------------------------------|-----|--------------------------------------------------------------------------------------------|------------------------------------------------------------------------------------------------|-----|---------------------|------------------------------------------------------------------------------|--------------|-------------------------|
|                                     | Biochemical Markers                                                                                                                |                                           |              |              |              |                                                                  |     |                                                                                            |                                                                                                |     |                     |                                                                              |              |                         |
| Posthumus et al., 2016 (37)         | The Model Was Developed From Maternal Medical And Non-Medical Risk Factors                                                         | Calibration Plot                          | Not reported | Not reported | Not reported | Not reported                                                     | No  | Not reported                                                                               | Not reported                                                                                   | Yes | Multiple Imputation | Stepwise Selection (Forward Selection Followed By Series Backward Selection) | Not reported | Risk Score Card         |
| Baekgaard Thorson et al., 2020 (94) | Model Was Developed By Considering Plasma Growth Factor                                                                            | AUC Sensitivity, Specificity, PPV And NPV | Not reported | Not reported | Not reported | 0.75(NR,NR)                                                      | Yes | SGA = 69.7 % Preeclampsia With SGA = 100% Non-Preeclampsia With SGA = 64% Term SGA = 66.7% | SGA = 72.4 % Preeclampsia with SGA = 87.3 % Non-Preeclampsia With SGA = 66.5% Term SGA = 72.2% | No  | Not reported        | Multivariate Logistic Regression                                             | Not reported | Regression Coefficients |
| Kato et al., 2021 (95)              | A Retrospective and Cross-Sectional Study Involving 231 Fetuses                                                                    | AUC Sensitivity Specificity PPV NPV       | Not reported | Not reported | Not reported | 0.832(0.766,0.899)                                               | Yes | 61.9 % (47.2%,76.6 %)                                                                      | 84.1 % (78.90%, 89.30%)                                                                        | No  | N/A                 | Not reported                                                                 | Not reported | Not reported            |
| Quant et al., 2016 (96)             | The Model Was Developed From Collected Cohort Done By First Trimester and Variables Selected By Multi Variable Logistic Regression | Sensitivity Specificity AUC               | Not reported | Not reported | Not reported | 0.74(0.72,0.76)                                                  | Yes | 38 % (32.5%, 45%)                                                                          | 82 % (79.5%, 84.4%)                                                                            | No  | N/A                 | Based On Clinical Experience And Multi Variable Logistic Regression          | Kept Linear  | By Prediction Rule      |
| Quinto et al., 2015 (97)            | The Model Was Developed From Variables Quadrant Maternal and fetal factors                                                         | AUC Sensitivity Specificity               | Not reported | Not reported | Not reported | 0.742(NR,NR)                                                     | Yes | 88%                                                                                        | 52%                                                                                            | NO  | N/A                 | Not reported                                                                 | Kept Linear  | Prediction Rule         |
| Leavitt et al., 2021 (98)           | This prognostic model compares the predictive accuracy of cerebro-placental ratio (CPR) versus umbilical artery (UA)               | AUC Sensitivity Specificity               | Not reported | Not reported | Not reported | CPR=0.51( 0.48,0.53 ) and Abnormal UA Doppler= 0.54, (0.50,0.58) | yes | low CPR 4.4% and Abnormal UA Doppler 12.8%                                                 | low CPR 96.5 and Abnormal UA Doppler 95.6%                                                     | No  | N/A                 | Not reported                                                                 | Kept linear  | Not reported            |

|                              |                                                                                                                                                          |                                 |               |              |              |                                                                                                                                                                      |     |                                                                                                                                                              |                                                                                                                                           |     |                     |              |              |                        |
|------------------------------|----------------------------------------------------------------------------------------------------------------------------------------------------------|---------------------------------|---------------|--------------|--------------|----------------------------------------------------------------------------------------------------------------------------------------------------------------------|-----|--------------------------------------------------------------------------------------------------------------------------------------------------------------|-------------------------------------------------------------------------------------------------------------------------------------------|-----|---------------------|--------------|--------------|------------------------|
| Schneuer et al., 2014 (9)    | The Model Was Developed From Maternal Characteristics Like Age, Weight, Country Of Birth, Socio Economic Status                                          | AUC Sensitivity Specificity     | Not reported  | Not reported | Not reported | Ang-1/Ang-2 Ratio ; 0.70 (NR,NR) Maternal Risk Factors 0.58(NR,NR)                                                                                                   | Yes | <10%                                                                                                                                                         | Not reported                                                                                                                              | Yes | Multiple Imputation | Not reported | Not reported | Algorithm              |
| Schwarz et al., 2014 (99)    | The Model Was Developed By Using 3D Ultrasound Measurement Of Placental Parameters and Maternal Serum                                                    | AUC And Sensitivity Specificity | Bootstrapping | Not reported | Not reported | PV= 0.793(0.723, 0.862)<br>PQ=0.797(0.728 ,0.866)<br>MVD= 0.784 (0.716,0.852)<br>PMI= 0.776 (0.698,0.853)<br>MCD= 0.804 (0.734,0.874)<br>Mean PI=0.717 (0.628,0.807) | Yes | PV; 46.4% (28%,65.8%)<br>PQ;46.4%(8 % ,65.8%)<br>MPD; 39.3% (22.1%59.3 %),PMI;<br>50.0(31.1%, 68.9%)<br>MCD; 46.4% (28%,65.8%)<br>Mean PI=28.6% (14%, 48.9%) | PV= 79.1% (75.4%,82.4%)<br>PQ=80.0% (76.4%,83.2%)<br>PMI= 50.0% (31.1%, 68.9%)<br>MCD; 46.4% (28%,65.8%)<br>Mean PI; 28.6 % ( 14%, 48.9%) | No  | N/A                 | Not reported | Categorized  | Algorithm              |
| Schwarz et al., 2012 (100)   | The Model Was Developed From Two-Dimensional Sonographic Placental Measurement By Estimating Biometric Lags and Placenta Diameter and Thickness          | AUC                             | Not reported  | Not reported | Not reported | Not reported                                                                                                                                                         | No  | Not reported                                                                                                                                                 | Not reported                                                                                                                              | No  | N/A                 | Not reported | Kept Linear  | Prediction Rule        |
| Lesmes et al., 2015(b) (101) | Prospective Screening Study In Singleton Pregnancies, Delivered SGA Neonates With Birth Weight<5th Percentile (SGA <5th), In The Absence Of PE Was Done. | AUC                             | Not reported  | Not reported | Not reported | 0.963 (0.958, 0.967)                                                                                                                                                 | No  | Not reported                                                                                                                                                 | Not reported                                                                                                                              | No  | N/A                 | Not reported | Not reported | Not reported           |
| Seravalli et al., 2014       | The Model Was Developed From Previously Cohort                                                                                                           | AUC Sensitivity Specificity     | Not reported  | Not reported | Not reported | -AC 0.700(NR,NR) - HC =0.628(NR,NR),                                                                                                                                 | Yes | AC =52 %HC=73 %EFW=54%                                                                                                                                       | AC=77 %HC=50% EFW=70%                                                                                                                     | No  | N/A                 | Not reported | Categorized  | Regression Coefficient |

|                              |                                                                                                                                                                       |                                   |              |              |              |                                                                                                                                                                                             |     |                                                                                                                   |              |    |     |              |             |                                                          |
|------------------------------|-----------------------------------------------------------------------------------------------------------------------------------------------------------------------|-----------------------------------|--------------|--------------|--------------|---------------------------------------------------------------------------------------------------------------------------------------------------------------------------------------------|-----|-------------------------------------------------------------------------------------------------------------------|--------------|----|-----|--------------|-------------|----------------------------------------------------------|
| (102)                        | Of First Trimester Pregnancy's Who Had Follow Up Second Trimester Pregnancy's By Incorporating Doppler Indices And Fetal Biometry Markers                             |                                   |              |              |              | - EFW<br>=0.667(NR,NR)<br>Uta = 0.560(NR,NR)<br>UA-PI<br>=0.561(NR,NR)                                                                                                                      |     | Uta=41%<br>UA=52%                                                                                                 |              |    |     |              |             | ts                                                       |
| Lesmes et al., 2015(a) (103) | Model Was Developed Using Multivariable Logistic Regression                                                                                                           | AUC                               | Not reported | Not reported | Not reported | 0.804(0.802,0.807)                                                                                                                                                                          | No  | Not reported                                                                                                      | Not reported | N0 | N/A | Not reported | Kept Linear | Model Presented With Regression Coefficients And Formula |
| Lesmes et al., 2015(C) (104) | Model Develops From Combined Maternal Factors                                                                                                                         | AUC                               | Not reported | Not reported | Not reported | 0.852 (0.850,0.855)                                                                                                                                                                         | No  | Not reported                                                                                                      | Not reported | No | N/A | Not reported | Kept Linear | Regression Coefficients                                  |
| Souka et al., 2012 (105)     | The Model Was Developed Previously Cohort Of 1st Trimester Pregnancy's Who Had 3rd Trimester Follow Up By Measuring Fetal Biometry Indices Through Doppler Ultrasound | AUC<br>Sensitivity<br>Specificity | Not reported | Not reported | Not reported | -BPD;<br>0.745(0.7015,0.7883)<br>HC ;0.7509<br>(0,7074,0.7943)<br>AC;0.8470(0.8136,0.8803)<br>FL ;0.7371(0.6904,0.7837)<br><br>EFW;0.8657(0.8352,0.8961 )<br>UA-PI;<br>0.6350(0.583,0.6869) | Yes | At 25 % Coverage<br>BPD =58 %<br>HC=63%<br>AC =74 %<br>FL =60%<br>EFW = 81%<br>And UA-PI Mom =39%                 | Not reported | No | N/A | Not reported | Kept Linear | Regression Coefficients                                  |
| Souka et al., 2013 (106)     | The Model Was Developed By Estimating Fetal Biometry And Ultrasound Scanning In Late 3rd Trimester Of Pregnancy's                                                     | AUC<br>Sensitivity                | Not reported | Not reported | Not reported | 0.9074(NR,NR)                                                                                                                                                                               | Yes | At 25% Coverage<br>87.9% On Late Scan At 35-37 Weeks<br>By Ultrasound<br>In Early Scan 80.2%<br>In Below 34 Weeks | Not reported | No | N/A | Not reported | Kept Linear | Algorism                                                 |

|                                   |                                                                                                                                                                                                                                             |                                     |              |              |              |                     |     |                                 |                                  |     |                        |              |             |                         |
|-----------------------------------|---------------------------------------------------------------------------------------------------------------------------------------------------------------------------------------------------------------------------------------------|-------------------------------------|--------------|--------------|--------------|---------------------|-----|---------------------------------|----------------------------------|-----|------------------------|--------------|-------------|-------------------------|
| MacDonald et al., 2018 (107)      | Model Was Developed Using Logistic Regression                                                                                                                                                                                               | AUC Sensitivity Specificity PPV NPV | Not reported | Not reported | Not reported | 0.8637(NR,NR)       | Yes | 24.50%(16.5%,34%)               | 94.20%(90.1%,97%)                | No  | N/A                    | Not reported | Categorized | Not reported            |
| Ye et al., 2020 (108)             | The Model Was Developed From Threatened Preterm Labor and Health Groups Of Women That Uses Previously Collected Data At Dental Clinic And Predict SGA From Bacterial Antibody                                                               | AUC Sensitivity Specificity         | Not reported | No           | Not reported | 0.792(0.634, 0.951) | Yes | 78.6%                           | 72.7%                            | No  | N/A                    | Not reported | Categorized | Algorithm               |
| McCowan et.al, 2017 (109)         | The Model Develops From Bio Markers                                                                                                                                                                                                         | AUC                                 | Splinting    | Not reported | Not reported | 0.59(0.56, 0.62)    | Yes | 19%(14%,24%)                    | Not reported                     | Yes | Complete Case Analysis | Not reported | Kept Linear | Regression Coefficients |
| Wen et al., 2005 (110)            | The model use population based data set has two SGA prediction models for twin pregnancies, one for predicting the twin sets with one or both SGA twins (model 1) and the other for predicting the twin sets with both SGA twins (model 2). | AUC sensitivity Specificity         | Not reported | Not reported | Yes          | 0.604( 0.60,0.608)  | Yes | Model 1= 52.3%, Model 2= 32.8%, | Model-1 = 62.5%, model-2= 85.4%, | No  | N/A                    | Not reported | Categorized | Regression coefficients |
| Rosendahl and Kivinen.,1991 (111) | The model was developed by collected data from women and ultrasonography examination, their combined effect to predict SGA                                                                                                                  | sensitivity Specificity             | Not reported | Not reported | Not reported | Not reported        | yes | 70.1%                           | 95.50%                           | No  | N/A                    | Not reported | Kept linear | Regression coefficients |

**Table S6: Study characteristics prediction models for composite adverse birth outcome**

| Study                        | Country        | Study Design                                | Center          | Study Population                                                                                                                | Outcome                   | Sample Size |              | Outcome(N)   | Incidence    | Events Variable Per | Number Of Predictors                                                                                                                          | Model Type          | Model Analysis       |
|------------------------------|----------------|---------------------------------------------|-----------------|---------------------------------------------------------------------------------------------------------------------------------|---------------------------|-------------|--------------|--------------|--------------|---------------------|-----------------------------------------------------------------------------------------------------------------------------------------------|---------------------|----------------------|
|                              |                |                                             |                 |                                                                                                                                 |                           | Development | Validation   |              |              |                     |                                                                                                                                               |                     |                      |
| Ngwenya et al, 2021 (112)    | Zimbabwe       | A Retrospective Cross-Sectional             | Single Centered | Women With Severe Preeclampsia                                                                                                  | Adverse Birth Outcome     | 549         | Not reported | Not reported | Not reported | Not reported        | Gestational Age, Platelets Count, Alanine Transaminase Birth Weight                                                                           | Derivation          | Logistic Regression  |
| Griffin et.al, 2018 (7)      | UK And Ireland | Prospective Cohort                          | Multi Centered  | 2nd And 3rd Trimester Pregnant                                                                                                  | Adverse Birth Outcome     | 274         | 123          | 96           | 35%          | 9.6%                | Nephrin, CPA-4a, Sflt-1, Endoglin, Plgfa, Plgf/S-Flt Ratioa, Plgf/Endoglin Ratioa, Plgfa + CPA-4a + Plgf + Nephrin, Plgfa + Nephrin + CPA-4a  | Derivation          | Logistic Regression  |
| Karlsen et al., 2015 (113)   | Norway         | Prospective Longitudinal                    | Single Centered | Singleton Pregnancy 24-Weeks                                                                                                    | Adverse Birth Outcome     | 211         | Not reported | 89           | 42.2%        | Not reported        | Size And Conditional Growth Centiles                                                                                                          | Derivation          | Logistic Regression  |
| Legendijk et al., 2020 (114) | Netherlands    | Cluster Randomized Controlled Trial (C-RCT) | Multi Centered  | Women Who Originally Participated In The Intervention Arm Of The C-RCT Of Rotterdam Reproductive Risk Reduction(R4U) Score Card | Adverse Birth Outcome     | N/A         | 1752         | 282          | 16%          | 56.4                | Insufficient Social Support, Single Mother, Experience Of inadequate social support, SGA Obstetric History and Preterm Baby Obstetric History | External Validation | Logistic Regression  |
| Lean et al., 2021 (115)      | UK             | Prospective Cohort                          | Multi Centered  | Pregnant Women At 28 Weeks                                                                                                      | Adverse Perinatal Outcome | 528         | Not reported | 108          | 20.46%       | 27                  | Total Antioxidant Capacity, 8-Isoprostane, Human Placental Lactogen, Placental Growth Factor                                                  | Derivation          | Logistic Regression  |
| Mendoza et.al, 2021 (79)     | Spain          | prospective observational                   | Single centered | 1st, 2nd and 3rd trimester pregnant women                                                                                       | Adverse perinatal outcome | 31          | Not reported | 14           | 45.2%        | 14                  | cervical pessary placement                                                                                                                    | Derivation          | paired sample t-test |

**Table S6: Study characteristics prediction models for composite adverse birth outcome (continued)**

| Study                       | Model Development                                                            | Model Evaluation              | Internal Validation | External Validation | Calibration (P Value Hosmer-Lemeshow Test Or Calibration Plot) | Model Discrimination (AUC With 95% CI)                                                                          | Model Performance | Sensitivity With 95%CI                                                       | Specificity With 95%CI                                                      | Handling Of Missing Value | Method Of Handling Missing Value | Model Selection                                                                 | Handling Of Continuous Data | How Is The Model Presented |
|-----------------------------|------------------------------------------------------------------------------|-------------------------------|---------------------|---------------------|----------------------------------------------------------------|-----------------------------------------------------------------------------------------------------------------|-------------------|------------------------------------------------------------------------------|-----------------------------------------------------------------------------|---------------------------|----------------------------------|---------------------------------------------------------------------------------|-----------------------------|----------------------------|
| Ngwenya et al, 2021 (112)   | The Model Develops From Maternal And Neonatal Character In Composite Outcome | AUC                           | Bootstrapping       | No                  | Not reported                                                   | 0.902(0.876,0.927)                                                                                              | No                | Not reported                                                                 | Not reported                                                                | Not reported              | N/A                              | Stepwise Backward Selection                                                     | Categorized                 | Regression Coefficients    |
| Griffin et.al, 2018 (7)     | To Develop The Model Use Stepwise Logistic Regression For Bio Markers        | AUC, Sensitivity, Specificity | Splitting           | No                  | Not reported                                                   | 0.83(NR, NR)                                                                                                    | Yes               | 89.7% (91.7%, 94.7%)                                                         | 58.7% (51.1%,66%)                                                           | Yes                       | Complete Case Analysis           | Stepwise Selection (Forward Selection Followed By Series Of Backward Selection) | Kept Linear                 | Prediction Rule            |
| Karlsen et al., 2015 (113)  | Using Size And Growth Centiles Prediction Model Was Developed                | Specificity Sensitivity       | Not reported        | No                  | Not reported                                                   | Not Reported                                                                                                    | Yes               | 60%(49%, 69%)Using Size Centile, 39% (30%, 50%)Using Size And Growth Centile | 78% (70%, 84%) For Size Centile, 94% (89%, 97%)For Size And Growth Centiles | No                        | Not reported                     | Stepwise Forward Selection                                                      | Kept Linear                 | Not reported               |
| Lagedijk et al., 2020 (114) | N/A                                                                          | AUC                           | N/A                 | Yes                 | With Calibration Plot                                          | 0.61 (0.56, 0.66)                                                                                               | NO                | Not reported                                                                 | Not reported                                                                | No                        | N/A                              | Stepwise Forward Selection                                                      | Categorized                 | Not reported               |
| Lean et al., 2021 (115)     | Model Developed Using Multivariable Logistic Regression Model                | AUC                           | Not reported        | Not reported        | Not reported                                                   | Total Antioxidant Capacity:0.69(NR, NR)<br>8-Isoprostane = 0.66(NR,NR)<br>Human Placental Lactogen =0.68(NR,NR) | No                | Not reported                                                                 | Not reported                                                                | No                        | N/A                              | Stepwise Forward Selection                                                      | Categorized                 | Not reported               |

|                          |                                                       |     |              |              |              |                          |     |      |     |     |                        |              |              |                 |
|--------------------------|-------------------------------------------------------|-----|--------------|--------------|--------------|--------------------------|-----|------|-----|-----|------------------------|--------------|--------------|-----------------|
|                          |                                                       |     |              |              |              | ) ,PIGF =<br>0.74(NR,NR) |     |      |     |     |                        |              |              |                 |
| Mendoza et.al, 2021 (79) | The model develops from by cervical pessary placement | AUC | Not reported | Not reported | Not reported | 0.88 (0.76,1.00)         | Yes | 100% | 80% | Yes | Complete case analysis | Not reported | Not reported | Prediction rule |

### Reference

1. Hange U, Selvaraj R, Galani M, Letsholo K, editors. A data-mining model for predicting low birth weight with a high AUC. International Conference on Computer and Information Science; 2017: Springer.
2. Hassen HY, Gebreyesus SH, Endris BS, Roro MA, Van Geertruyden J-P. Development and validation of a risk score to predict low birthweight using characteristics of the mother: analysis from BUNMAP cohort in Ethiopia. *Journal of clinical medicine*. 2020;9(5):1587.
3. Hernández-Castro F, Berlanga-Garza A, Cruz-Gutiérrez MD, Soria-López JA, Villagómez-Martínez GE, Dávila-Escamilla IV. Prediction of low birth weight with hypoglycemia in glucose tolerance test. *Revista de Saúde Pública*. 2021;55.
4. Goyal NK, Hall ES, Greenberg JM, Kelly EA. Risk Prediction for Adverse Pregnancy Outcomes in a Medicaid Population. *Journal of Womens Health*. 2015;24(8):681-8.
5. Goyal NK, Hall ES, Greenberg JM, Kelly EA. Risk prediction for adverse pregnancy outcomes in a medicaid population. *Journal of Women's Health*. 2015;24(8):681-8.
6. O'Reilly-Green CP, Divon MY. Receiver operating characteristic curves of ultrasonographic estimates of fetal weight for prediction of fetal growth restriction in prolonged pregnancies. *American journal of obstetrics and gynecology*. 1999;181(5):1133-8.
7. Griffin M, Seed PT, Duckworth S, North R, Myers J, Mackillop L, et al. Predicting delivery of a small-for-gestational-age infant and adverse perinatal outcome in women with suspected pre-eclampsia. *Ultrasound in Obstetrics & Gynecology*. 2018;51(3):387-95.
8. Ryu A, Cho NJ, Kim YS, Lee EY. Predictive value of serum uric acid levels for adverse perinatal outcomes in preeclampsia. *Medicine*. 2019;98(18).
9. Schneuer FJ, Roberts CL, Ashton AW, Guilbert C, Tasevski V, Morris JM, et al. Angiotensin 1 and 2 serum concentrations in first trimester of pregnancy as biomarkers of adverse pregnancy outcomes. *American journal of obstetrics and gynecology*. 2014;210(4):345. e1- e9.
10. Bartnicki J, Casal D, Kreaden US, Saling E, Vetter K. Fetal fibronectin in vaginal specimens predicts preterm delivery and very-low-birth-weight infants. *American journal of obstetrics and gynecology*. 1996;174(3):971-4.
11. Cohen JL, Smilen KE, Bianco AT, Moshier EL, Ferrara LA, Stone JL. Predictive value of combined serum biomarkers for adverse pregnancy outcomes. *European Journal of Obstetrics & Gynecology and Reproductive Biology*. 2014;181:89-94.
12. Sinding M, Peters DA, Frøkjær JB, Christiansen OB, Petersen A, Uldbjerg N, et al. Prediction of low birth weight: Comparison of placental T2\* estimated by MRI and uterine artery pulsatility index. *Placenta*. 2017;49:48-54.
13. Singh A, Arya S, Chellani H, Aggarwal K, Pandey R. Prediction model for low birth weight and its validation. *The Indian Journal of Pediatrics*. 2014;81(1):24-8.
14. Wu W, Zhang B, Li D, Yan M, Deng Q, Kang Y, et al. Development and validation of nomogram for prediction of low birth weight: a large-scale cross-sectional study in northwest China. *The Journal of Maternal-Fetal & Neonatal Medicine*. 2021:1-9.
15. Zahirzada A, Lavangnananda K, editors. Implementing predictive model for Low Birth Weight in Afghanistan. 2021 13th International Conference on Knowledge and Smart Technology (KST); 2021: IEEE.
16. Reeb KG, Graham AV, Zyzanski SJ, Kitson GC. Predicting low birthweight and complicated labor in urban black women: a biopsychosocial perspective. *Social Science & Medicine*. 1987;25(12):1321-7.
17. Rezaei M, Mehr AJ, Hashemian AH, Olang B, Rezaei K. Predicting factors of neonate birth weight. *Der Pharmacia Lettre*. 2016;8(1):457-63.
18. Owen J, Goldenberg RL, Davis RO, Kirk KA, Copper RL. Evaluation of a risk scoring system as a predictor of preterm birth in an indigent population. *American journal of obstetrics and gynecology*. 1990;163(3):873-9.
19. Carter J, Seed PT, Watson HA, David A, Sandall J, Shennan AH, et al. Development and validation of predictive models for QUIPP App v. 2: tool for predicting preterm birth in women with symptoms of threatened preterm labor. *Ultrasound in obstetrics & gynecology*. 2020;55(3):357-67.
20. Celik E, To M, Gajewska K, Smith G, Nicolaides K. Cervical length and obstetric history predict spontaneous preterm birth: development and validation of a model to provide individualized risk assessment. *Ultrasound in Obstetrics and Gynecology: The Official Journal of the International Society of Ultrasound in Obstetrics and Gynecology*. 2008;31(5):549-54.
21. Crane J, Hutchens D. Use of transvaginal ultrasonography to predict preterm birth in women with a history of preterm birth. *Ultrasound in Obstetrics and Gynecology: The Official Journal of the International Society of Ultrasound in Obstetrics and Gynecology*. 2008;32(5):640-5.
22. Damaso EL, Rolnik DL, Cavalli RdC, Quintana SM, Duarte G, da Silva Costa F, et al. Prediction of preterm birth by maternal characteristics and medical history in the Brazilian population. *Journal of pregnancy*. 2019;2019.

23. He J-R, Ramakrishnan R, Lai Y-M, Li W-D, Zhao X, Hu Y, et al. Predictions of preterm birth from early pregnancy characteristics: born in guangzhou cohort study. *Journal of clinical medicine*. 2018;7(8):185.
24. Hebbar S, Samjhana K. Role of mid-trimester transvaginal cervical ultrasound in prediction of preterm delivery. *The Medical journal of Malaysia*. 2006;61(3):307-11.
25. Hebert CL, Nattino G, Gabbe SG, Gabbe PT, Benedict J, Phillips G, et al. Predictive Models for Very Preterm Birth: Developing a Point-of-Care Tool. *American Journal of Perinatology*. 2022;39(01):092-8.
26. Newman R, Goldenberg R, Iams J, Meis P, Mercer B, Moawad A, et al. Preterm prediction study: comparison of the cervical score and Bishop score for prediction of spontaneous preterm delivery. *Obstetrics and gynecology*. 2008;112(3):508.
27. Hellemans P, Gerris J, Verdonk P. Fetal fibronectin detection for prediction of preterm birth in low risk women. *BJOG: An International Journal of Obstetrics & Gynaecology*. 1995;102(3):207-12.
28. Fergus P, Cheung P, Hussain A, Al-Jumeily D, Dobbins C, Iram S. Prediction of preterm deliveries from EHG signals using machine learning. *PloS one*. 2013;8(10):e77154.
29. Jelliffe-Pawlowski LL, Rand L, Bedell B, Baer RJ, Oltman SP, Norton ME, et al. Correction: Prediction of preterm birth with and without preeclampsia using mid-pregnancy immune and growth-related molecular factors and maternal characteristics. *Journal of Perinatology*. 2018;38(7):946-.
30. Jung YJ, Kwon H, Shin J, Park Y, Heo S-J, Park HS, et al. The feasibility of cervical elastography in predicting preterm delivery in singleton pregnancy with short cervix following progesterone treatment. *International journal of environmental research and public health*. 2021;18(4):2026.
31. Nikolova T, Uotila J, Nikolova N, Bolotskikh VM, Borisova VY, Di Renzo GC. Prediction of spontaneous preterm delivery in women presenting with premature labor: a comparison of placenta alpha microglobulin-1, phosphorylated insulin-like growth factor binding protein-1, and cervical length. *American journal of obstetrics and gynecology*. 2018;219(6):610. e1-. e9.
32. Alleman BW, Smith AR, Byers HM, Bedell B, Ryckman KK, Murray JC, et al. A proposed method to predict preterm birth using clinical data, standard maternal serum screening, and cholesterol. *American journal of obstetrics and gynecology*. 2013;208(6):472. e1-. e11.
33. Andersen HF, Nugent CE, Wanty SD, Hayashi RH. Prediction of risk for preterm delivery by ultrasonographic measurement of cervical length. *American journal of obstetrics and gynecology*. 1990;163(3):859-67.
34. Grobman WA, Lai Y, Iams JD, Reddy UM, Mercer BM, Saade G, et al. Prediction of spontaneous preterm birth among nulliparous women with a short cervix. *Journal of Ultrasound in Medicine*. 2016;35(6):1293-7.
35. Park S, Oh D, Heo H, Lee G, Kim SM, Ansari A, et al. Prediction of preterm birth based on machine learning using bacterial risk score in cervicovaginal fluid. *American Journal of Reproductive Immunology*. 2021;86(3):e13435.
36. Pasquini L, Sisti G, Nasioudis D, Kanninen T, Sorbi F, Fambrini M, et al. Ability of cervical length to predict spontaneous preterm delivery in twin pregnancies using the receiver-operating characteristic curve analysis and an a priori cut-off value. *Journal of Obstetrics and Gynaecology*. 2017;37(5):562-5.
37. Posthumus A, Birnie E, van Veen M, Steegers E, Bonsel G. An antenatal prediction model for adverse birth outcomes in an urban population: the contribution of medical and non-medical risks. *Midwifery*. 2016;38:78-86.
38. Dziadosz M, Bennett T-A, Dolin C, Honart AW, Pham A, Lee SS, et al. Uterocervical angle: a novel ultrasound screening tool to predict spontaneous preterm birth. *American journal of obstetrics and gynecology*. 2016;215(3):376. e1-. e7.
39. Prema N, Pushpalatha M. Machine learning approach for preterm birth prediction based on maternal chronic conditions. *Emerging Research in Electronics, Computer Science and Technology*: Springer; 2019. p. 581-8.
40. García-Blanco A, Diago V, De La Cruz VS, Hervás D, Cháfer-Pericás C, Vento M. Can stress biomarkers predict preterm birth in women with threatened preterm labor? *Psychoneuroendocrinology*. 2017;83:19-24.
41. Raba G, Kotarski J. Evaluation of risk factors can help to predict preterm delivery within 7 days in women hospitalized for threatened preterm labour. *The Journal of Maternal-Fetal & Neonatal Medicine*. 2016;29(19):3142-6.
42. Rafael TJ, Hoffman MK, Leiby BE, Berghella V. Gestational age of previous twin preterm birth as a predictor for subsequent singleton preterm birth. *American journal of obstetrics and gynecology*. 2012;206(2):156. e1-. e6.
43. Crane JM, Armson BA, Dodds L, Feinberg RF, Kennedy W, Kirkland SA. Risk scoring, fetal fibronectin, and bacterial vaginosis to predict preterm delivery. *Obstetrics & Gynecology*. 1999;93(4):517-22.
44. Baer RJ, McLemore MR, Adler N, Oltman SP, Chambers BD, Kuppermann M, et al. Pre-pregnancy or first-trimester risk scoring to identify women at high risk of preterm birth. *European Journal of Obstetrics & Gynecology and Reproductive Biology*. 2018;231:235-40.
45. Riboni F, Vitulo A, Dell'avano M, Plebani M, Battagliarin G, Paternoster D. Biochemical markers predicting pre-term delivery in symptomatic patients: phosphorylated insulin-like growth factor binding protein-1 and fetal fibronectin. *Archives of gynecology and obstetrics*. 2011;284(6):1325-9.
46. Baños N, Murillo-Bravo C, Julià C, Migliorelli F, Perez-Moreno A, Ríos J, et al. Mid-trimester sonographic cervical consistency index to predict spontaneous preterm birth in a low-risk population. *Ultrasound in Obstetrics & Gynecology*. 2018;51(5):629-36.
47. Riboni F, Vitulo A, Plebani M, Dell'avano M, Battagliarin G, Paternoster D. Combination of biochemical markers in predicting pre-term delivery. *Archives of gynecology and obstetrics*. 2012;285(1):61-6.
48. Kim MA, Lee BS, Park YW, Seo K. Serum markers for prediction of spontaneous preterm delivery in preterm labour. *European journal of clinical investigation*. 2011;41(7):773-80.



49. Baraldi E, Giordano G, Stocchero M, Moschino L, Zaramella P, Tran MR, et al. Untargeted metabolomic analysis of amniotic fluid in the prediction of preterm delivery and bronchopulmonary dysplasia. *PLoS One*. 2016;11(10):e0164211.
50. Ridout AE, Ibetto LA, Ross GN, Cook JR, Sykes L, David AL, et al. Cervical length and quantitative fetal fibronectin in the prediction of spontaneous preterm birth in asymptomatic women with congenital uterine anomaly. *American Journal of Obstetrics and Gynecology*. 2019;221(4):341. e1-. e9.
51. Gioan M, Fenollar F, Loundou A, Menard J-P, Blanc J, d'Ercole C, et al. Development of a nomogram for individual preterm birth risk evaluation. *Journal of Gynecology Obstetrics and Human Reproduction*. 2018;47(10):545-8.
52. Koivu A, Sairanen M. Predicting risk of stillbirth and preterm pregnancies with machine learning. *Health information science and systems*. 2020;8(1):1-12.
53. Barinov SV, Di Renzo GC, Belinina AA, Koliado OV, Remneva OV. Clinical and biochemical markers of spontaneous preterm birth in singleton and multiple pregnancies. *The Journal of Maternal-Fetal & Neonatal Medicine*. 2021:1-6.
54. Kuhrt K, Hezelgrave N, Foster C, Seed P, Shennan A. Development and validation of a tool incorporating quantitative fetal fibronectin to predict spontaneous preterm birth in symptomatic women. *Ultrasound in Obstetrics & Gynecology*. 2016;47(2):210-6.
55. Rohlfing AB, Nah G, Ryckman KK, Snyder BD, Kasarek D, Paynter RA, et al. Maternal cardiovascular disease risk factors as predictors of preterm birth in California: a case-control study. *BMJ open*. 2020;10(6):e034145.
56. Bastek JA, Sammel MD, Srinivas SK, McShea MA, Foreman MN, Elovitz MA, et al. Clinical prediction rules for preterm birth in patients presenting with preterm labor. *Obstetrics & Gynecology*. 2012;119(6):1119-28.
57. Saade GR, Boggess KA, Sullivan SA, Markenson GR, Iams JD, Coonrod DV, et al. Development and validation of a spontaneous preterm delivery predictor in asymptomatic women. *American journal of obstetrics and gynecology*. 2016;214(5):633. e1-. e24.
58. Lee KA, Chang MH, Park M-H, Park H, Ha EH, Park EA, et al. A model for prediction of spontaneous preterm birth in asymptomatic women. *Journal of Women's Health*. 2011;20(12):1825-31.
59. Arabi Belaghi R, Beyene J, McDonald SD. Prediction of preterm birth in nulliparous women using logistic regression and machine learning. *PloS one*. 2021;16(6):e0252025.
60. Schmitz T, Kayem G, Maillard F, Lebret MT, Cabrol D, Goffinet F. Selective use of sonographic cervical length measurement for predicting imminent preterm delivery in women with preterm labor and intact membranes. *Ultrasound in Obstetrics and Gynecology: The Official Journal of the International Society of Ultrasound in Obstetrics and Gynecology*. 2008;31(4):421-6.
61. Lee KJ, Yoo J, Kim Y-H, Kim SH, Kim SC, Kim YH, et al. The clinical usefulness of predictive models for preterm birth with potential benefits: A Korean Preterm collaborate network (KOPEN) registry-linked data-based cohort study. *International journal of medical sciences*. 2020;17(1):1.
62. Menon R, Bhat G, Saade GR, Spratt H. Multivariate adaptive regression splines analysis to predict biomarkers of spontaneous preterm birth. *Acta obstetrica et gynecologica Scandinavica*. 2014;93(4):382-91.
63. Lee S, Park J, Norwitz E, Oh S, Kim E, Kim S, et al. Mid-trimester amniotic fluid pro-inflammatory biomarkers predict the risk of spontaneous preterm delivery in twins: a retrospective cohort study. *Journal of Perinatology*. 2015;35(8):542-6.
64. Leow SM, Di Quinzio MK, Ng ZL, Grant C, Amitay T, Wei Y, et al. Preterm birth prediction in asymptomatic women at mid-gestation using a panel of novel protein biomarkers: the Prediction of PreTerm Labor (PpTaL) study. *American Journal of Obstetrics & Gynecology MFM*. 2020;2(2):100084.
65. Leung T, Pang M, Leung T, Poon C, Wong S, Lau T. Cervical length at 18-22 weeks of gestation for prediction of spontaneous preterm delivery in Hong Kong Chinese women. *Ultrasound in Obstetrics and Gynecology: The Official Journal of the International Society of Ultrasound in Obstetrics and Gynecology*. 2005;26(7):713-7.
66. Lin Y, He F, Gao R, Liu T, Zhao K, He J, et al. A Clinical Nomogram For Predicting Preterm Birth in Women Who Conceived Through Assisted Reproductive Technology. 2021.
67. Liu Y, Zhu Y, Liu Y, Liu M, Zhang Y, Chen J, et al. Nomogram to predict the risk of preterm birth before 37 weeks and 34 weeks in pregnant women with a short cervix. *The Journal of Maternal-Fetal & Neonatal Medicine*. 2020:1-10.
68. van de Mheen L, Schuit E, Lim AC, Porath MM, Papatsonis D, Erwich JJ, et al. Prediction of preterm birth in multiple pregnancies: development of a multivariable model including cervical length measurement at 16 to 21 weeks' gestation. *Journal of obstetrics and gynaecology Canada*. 2014;36(4):309-19.
69. Yazici G, Yildiz A, Tiras MB, Arslan M, Kanik A, Oz U. Comparison of transperineal and transvaginal sonography in predicting preterm delivery. *Journal of Clinical Ultrasound*. 2004;32(5):225-30.
70. Mueller-Heubach E, Guzik DS. Evaluation of risk scoring in a preterm birth prevention study of indigent patients. *American Journal of Obstetrics and Gynecology*. 1989;160(4):829-37.
71. Mortensen OA, Franklin J, Lofstrand T, Svanberg B. Prediction of preterm birth. *Acta Obstetrica et Gynecologica Scandinavica*. 1987;66(6):507-12.
72. Morken NH, Kaellen K, Jacobsson B. Predicting risk of spontaneous preterm delivery in women with a singleton pregnancy. *Paediatric and perinatal epidemiology*. 2014;28(1):11-22.
73. Zhang J, Pan M, Zhan W, Zheng L, Jiang X, Xue X. Two-stage nomogram models in mid-gestation for predicting the risk of spontaneous preterm birth in twin pregnancy. *Archives of Gynecology and Obstetrics*. 2021;303(6):1439-49.
74. Macdonald-Wallis C, Silverwood RJ, De Stavola BL, Inskip H, Cooper C, Godfrey KM, et al. Antenatal blood pressure for prediction of pre-eclampsia, preterm birth, and small for gestational age babies: development and validation in two general population cohorts. *Bmj*. 2015;351.
75. Mailath-Pokorny M, Polteraue S, Kohl M, Kueronyai V, Worda K, Heinze G, et al. Individualized assessment of preterm birth risk using two modified prediction models. *European Journal of Obstetrics & Gynecology and Reproductive Biology*. 2015;186:42-8.
76. McLean M, Bisits A, Davies J, Walters W, Hackshaw A, De Voss K, et al. Predicting risk of preterm delivery by second-trimester measurement of maternal plasma corticotropin-releasing hormone and  $\alpha$ -fetoprotein concentrations. *American journal of obstetrics and gynecology*. 1999;181(1):207-15.

77. Watson H, Seed P, Carter J, Hezelgrave N, Kuhrt K, Tribe R. Development and validation of the predictive models for the QUIPP App vol 2: a tool for predicting preterm birth in high-risk asymptomatic women. *Ultrasound Obstet Gynecol.* 2019.
78. Mehta-Lee SS, Palma A, Bernstein PS, Lounsbury D, Schlecht NF. A preconception nomogram to predict preterm delivery. *Maternal and child health journal.* 2017;21(1):118-27.
79. Mendoza M, Maiz N, Garcia-Ruiz I, Vargas M, Rodo C, Goya M, et al. Prediction of preterm birth and adverse perinatal outcomes after cervical pessary placement in singleton pregnancies with short cervical length. *The Journal of Maternal-Fetal & Neonatal Medicine.* 2021;34(19):3147-53.
80. Zhu Y-z, Peng G-q, Tian G-x, Qu X-l, Xiao S-y. New model for predicting preterm delivery during the second trimester of pregnancy. *Scientific reports.* 2017;7(1):1-9.
81. Radhouane A, Nadia BJ, Imen K, Cheour M, Ines B, Feirouz A, et al. Ultrasound cervical length in predicting preterm birth: Prospective study. *Australasian Medical Journal (Online).* 2017;10(8):647.
82. Bachkangi P, Taylor A, Bari M, Maccarrone M, Konje JC. Prediction of preterm labour from a single blood test: The role of the endocannabinoid system in predicting preterm birth in high-risk women. *European Journal of Obstetrics & Gynecology and Reproductive Biology.* 2019;243:1-6.
83. Szymusik I, Wegrzyn P, Marianowski P, Dziadecki W, Bablok L, Wielgos M. Is mid-gestational cervical length measurement as sensitive prediction factor of preterm delivery in IVF as in spontaneous singleton pregnancies? *Neuroendocrinology Letters.* 2011;32(4).
84. Schaaf JM, Ravelli AC, Mol BWJ, Abu-Hanna A. Development of a prognostic model for predicting spontaneous singleton preterm birth. *European Journal of Obstetrics & Gynecology and Reproductive Biology.* 2012;164(2):150-5.
85. Akolekar R, Tokunaka M, Ortega N, Syngelaki A, Nicolaides KH. Prediction of stillbirth from maternal factors, fetal biometry and uterine artery Doppler at 19–24 weeks. *Ultrasound in Obstetrics & Gynecology.* 2016;48(5):624-30.
86. Akolekar R, Machuca M, Mendes M, Paschos V, Nicolaides K. Placental growth factor in prediction of stillbirths at 11–13 weeks. *Ultrasound Obstet Gynecol.* 2016;48:618-23.
87. Åmark H, Westgren M, Persson M. Prediction of stillbirth in women with overweight or obesity—A register-based cohort study. *PloS one.* 2018;13(11):e0206940.
88. Aupont JE, Akolekar R, Illian A, Neonakis S, Nicolaides KH. Prediction of stillbirth from placental growth factor at 19–24 weeks. *Ultrasound in Obstetrics & Gynecology.* 2016;48(5):631-5.
89. Bahado-Singh RO, Syngelaki A, Mandal R, Han B, Li L, Bjorndahl TC, et al. First-trimester metabolomic prediction of stillbirth. *The Journal of Maternal-Fetal & Neonatal Medicine.* 2019;32(20):3435-41.
90. Mastrodima S, Akolekar R, Yerlikaya G, Tzelepis T, Nicolaides KH. Prediction of stillbirth from biochemical and biophysical markers at 11–13 weeks. *Ultrasound in obstetrics & gynecology.* 2016;48(5):613-7.
91. Kim M-A, Han GH, Kim Y-H. Prediction of small-for-gestational age by fetal growth rate according to gestational age. *PloS one.* 2019;14(4):e0215737.
92. Antunes IR, Lobo GAR, Júnior EA, da Silva Pares DB. Predictive values of clinical parameters and biophysical and biochemical markers in the first trimester for the detection of small-for-gestational age fetuses. *Journal of Perinatal Medicine.* 2021;49(1):73-9.
93. Poon LC, Lesmes C, Gallo DM, Akolekar R, Nicolaides KH. Prediction of small-for-gestational-age neonates: screening by biophysical and biochemical markers at 19–24 weeks. *Ultrasound in Obstetrics & Gynecology.* 2015;46(4):437-45.
94. Bækgaard Thorsen LH, Bjørkholt Andersen L, Birukov A, Lykkedegn S, Dechend R, Stener Jørgensen J, et al. Prediction of birth weight small for gestational age with and without preeclampsia by angiogenic markers: an Odense Child Cohort study. *The Journal of Maternal-Fetal & Neonatal Medicine.* 2020;33(8):1377-84.
95. Kato DMP, Lorusso L, Bruns RF, Pinhat EC, Dalla Costa NRA, Pletsch L, et al. Performance of a local reference curve for predicting small for gestational age fetuses in pregnant women with HIV/AIDS. *Journal of Clinical Ultrasound.* 2021;49(4):322-7.
96. Quant HS, Sammel MD, Parry S, Schwartz N. Second-trimester 3-dimensional placental sonography as a predictor of small-for-gestational-age birth weight. *Journal of Ultrasound in Medicine.* 2016;35(8):1693-702.
97. Quinton A, Cook C, Peek M. The prediction of the small for gestational age fetus with the head circumference to abdominal circumference (HC/AC) ratio: a new look at an old measurement. *Sonography.* 2015;2(2):27-31.
98. Leavitt K, Odibo L, Nwabuobi C, Tuuli MG, Odibo A. The value of introducing cerebroplacental ratio (CPR) versus umbilical artery (UA) Doppler alone for the prediction of neonatal small for gestational age (SGA) and short-term adverse outcomes. *The Journal of Maternal-Fetal & Neonatal Medicine.* 2021;34(10):1565-9.
99. Schwartz N, Sammel MD, Leite R, Parry S. First-trimester placental ultrasound and maternal serum markers as predictors of small-for-gestational-age infants. *American journal of obstetrics and gynecology.* 2014;211(3):253. e1-. e8.
100. Schwartz N, Wang E, Parry S. Two-dimensional sonographic placental measurements in the prediction of small-for-gestational-age infants. *Ultrasound in obstetrics & gynecology.* 2012;40(6):674-9.
101. Lesmes C, Gallo DM, Gonzalez R, Poon LC, Nicolaides KH. Prediction of small-for-gestational-age neonates: screening by maternal serum biochemical markers at 19–24 weeks. *Ultrasound in Obstetrics & Gynecology.* 2015;46(3):341-9.
102. Seravalli V, Block-Abraham DM, Turan OM, Doyle LE, Blitzer MG, Baschat AA. Second-trimester prediction of delivery of a small-for-gestational-age neonate: integrating sequential Doppler information, fetal biometry, and maternal characteristics. *Prenatal diagnosis.* 2014;34(11):1037-43.
103. Lesmes C, Gallo D, Panaiotova J, Poon L, Nicolaides K. Prediction of small-for-gestational-age neonates: screening by fetal biometry at 19–24 weeks. *Ultrasound in Obstetrics & Gynecology.* 2015;46(2):198-207.
104. Lesmes C, Gallo DM, Saiid Y, Poon LC, Nicolaides KH. Prediction of small-for-gestational-age neonates: screening by uterine artery Doppler and mean arterial pressure at 19–24 weeks. *Ultrasound in Obstetrics & Gynecology.* 2015;46(3):332-40.

105. Souka A, Papastefanou I, Pilalis A, Michalitsi V, Kassanos D. Performance of third-trimester ultrasound for prediction of small-for-gestational-age neonates and evaluation of contingency screening policies. *Ultrasound in obstetrics & gynecology*. 2012;39(5):535-42.
106. Souka AP, Papastefanou I, Pilalis A, Michalitsi V, Panagopoulos P, Kassanos D. Performance of the ultrasound examination in the early and late third trimester for the prediction of birth weight deviations. *Prenatal Diagnosis*. 2013;33(10):915-20.
107. MacDonald TM, Tran C, Kaitu'u-Lino TuJ, Brennecke SP, Hiscock RJ, Hui L, et al. Assessing the sensitivity of placental growth factor and soluble fms-like tyrosine kinase 1 at 36 weeks' gestation to predict small-for-gestational-age infants or late-onset preeclampsia: a prospective nested case-control study. *BMC pregnancy and childbirth*. 2018;18(1):1-12.
108. Ye C, Kobayashi H, Katagiri S, Miyasaka N, Takeuchi Y, Kuraji R, et al. The relationship between the anti-Porphyromonas gingivalis immunoglobulin G subclass antibody and small for gestational age delivery: a longitudinal study in pregnant Japanese women. *International Dental Journal*. 2020;70(4):296-302.
109. McCowan LM, Thompson JM, Taylor RS, Baker PN, North RA, Poston L, et al. Prediction of small for gestational age infants in healthy nulliparous women using clinical and ultrasound risk factors combined with early pregnancy biomarkers. *PLoS One*. 2017;12(1):e0169311.
110. Wen SW, Tan H, Yang Q, Walker M. Prediction of small for gestational age by logistic regression in twins. *Australian and New Zealand journal of obstetrics and gynaecology*. 2005;45(5):399-404.
111. Rosendahl H, Kivinen S. Detection of small for gestational age fetuses by the combination of clinical risk factors and ultrasonography. *European Journal of Obstetrics & Gynecology and Reproductive Biology*. 1991;39(1):7-11.
112. Ngwenya S, Jones B, Mwembe D, Nare H, Heazell AEP. Development and validation of risk prediction models for adverse maternal and neonatal outcomes in severe preeclampsia in a low-resource setting, Mpilo Central Hospital, Bulawayo, Zimbabwe. *Pregnancy Hypertension*. 2021;23:18-26.
113. Karlsen H, Johnsen S, Rasmussen S, Kiserud T. Prediction of adverse neonatal outcomes using size centiles and conditional growth centiles. *Ultrasound in obstetrics & gynecology: the official journal of the International Society of Ultrasound in Obstetrics and Gynecology*. 2015.
114. Lagendijk J, Steyerberg EW, Daalderop LA, Been JV, Steegers EA, Posthumus AG. Validation of a prognostic model for adverse perinatal health outcomes. *Scientific Reports*. 2020;10(1):1-7.
115. Lean SC, Jones RL, Roberts SA, Heazell AE. A prospective cohort study providing insights for markers of adverse pregnancy outcome in older mothers. *BMC pregnancy and childbirth*. 2021;21(1):1-17.
